1 A comprehensive evaluation of an artificial intelligence based digital  
2 pathology to monitor large-scale deworming programs against soil-  
3 transmitted helminths: a study protocol

4  
5 Peter K. Ward<sup>1,2,3¶\*</sup>, Sara Roose<sup>1¶</sup>, Mio Ayana<sup>4</sup>, Lindsay A. Broadfield<sup>2</sup>, Peter Dahlberg<sup>2</sup>, Narcis  
6 Kabatereine<sup>5</sup>, Adama Kazienga<sup>1</sup>, Zeleke Mekonnen<sup>4</sup>, Betty Nabatte<sup>5</sup>, Lieven Stuyver<sup>6</sup>, Fiona  
7 Vande Velde<sup>1</sup>, Sofie Van Hoecke<sup>3</sup>, Bruno Levecke<sup>1\*</sup>

8  
9 <sup>1</sup>Department of Translational Physiology, Infectiology and Public Health, Ghent University,  
10 Merelbeke, Belgium

11 <sup>2</sup>Enablers AB, Uppsala, Sweden

12 <sup>3</sup>IDLab, Department of Electronics and information systems, Ghent University – Imec,  
13 Zwijnaarde, Belgium

14 <sup>4</sup>Institute of Health, Jimma University, Jimma, Ethiopia

15 <sup>5</sup>Vector Borne and Neglected Tropical Diseases Division, Ministry of Health, Kampala, Uganda

16 <sup>6</sup>Scientific Advisor

17  
18 ¶ These authors contributed equally to this work.

19 \* Corresponding authors. Email: [bruno.levecke@UGent.be](mailto:bruno.levecke@UGent.be) (BL), [peter.ward@enablers.com](mailto:peter.ward@enablers.com)  
20 (PKW)

21

22

23 NOTE: This preprint reports new research that has not been certified by peer review and should not be used to guide clinical practice.

## 24 **Abstract**

25 **Background:** Manual screening of a Kato-Katz (KK) thick stool smear remains the current  
26 standard to monitor the impact of large-scale deworming programs against soil-transmitted  
27 helminths (STHs). To improve this diagnostic standard, we recently designed an artificial  
28 intelligence based digital pathology system (AI-DP) for digital image capture and analysis of  
29 KK thick smears. Preliminary results of its diagnostic performance are encouraging, and a  
30 comprehensive evaluation of this technology as a cost-efficient end-to-end diagnostic to  
31 inform STH control programs against the target product profiles (TPP) of the World Health  
32 Organisation (WHO) is the next step for validation.

33 **Methods:** Here, we describe the study protocol for a comprehensive evaluation of the AI-DP  
34 based on its (i) diagnostic performance, (ii) repeatability/reproducibility, (iii) time-to-result,  
35 (iv) cost-efficiency to inform large-scale deworming programs, and (v) usability in both  
36 laboratory and field settings. For each of these five attributes, we designed separate  
37 experiments with sufficient power to verify the non-inferiority of the AI-DP (KK2.0) over the  
38 manual screening of the KK stool thick smears (KK1.0). These experiments will be conducted  
39 in two STH endemic countries with national deworming programs (Ethiopia and Uganda),  
40 focussing on school-age children only.

41 **Discussion:** This comprehensive study will provide the necessary data to make an evidence-  
42 based decision on whether the technology is indeed performant and a cost-efficient end-to-  
43 end diagnostic to inform large-scale deworming programs against STHs. Following the  
44 protocolized collection of high-quality data we will seek approval by WHO. Through the  
45 dissemination of our methodology and statistics, we hope to support additional

46 developments in AI-DP technologies for other neglected tropical diseases in resource-limited  
47 settings.

48

## 49 **Trial registration**

50 The trial was registered on Clinicaltrials.gov (ID: NCT06055530).

## 51 **Author summary**

52 Millions of deworming tablets are annually administered to children to reduce the morbidity  
53 caused by intestinal worms. To monitor the progress of these large-scale deworming  
54 programs, periodic assessments are made regarding the occurrence and prevalence of  
55 intestinal worm infections. Manual examination of a stool smear through a compound  
56 microscope remains the current diagnostic standard. We recently developed a device that  
57 utilizes artificial intelligence (AI) to scan smears and recognize eggs of intestinal worms.  
58 Encouraging preliminary results of the diagnostic performance warrant additional and more  
59 research, essential for obtaining necessary approvals to support wide-scale adoption.  
60 Here, we describe the study protocols we will employ for a comprehensive evaluation of this  
61 AI-based device. The generated results will provide health decision-makers with evidence-  
62 based data to assess whether the tool can be recommended for informing large-scale  
63 deworming programs against intestinal worms. Additionally, we provide full access to our  
64 study documentation which may be relevant for evaluating other AI-based devices for  
65 intestinal worms.

## 66 Introduction

67 Soil-transmitted helminths (STHs) are a group of intestinal roundworms transmitted through  
68 the uptake of infectious life stages in the environment (often soil, referring to their common  
69 name) [1, 2]. STHs, including the giant round worm (*Ascaris lumbricoides*), whipworm  
70 (*Trichuris trichiura*) and hookworms (*Necator americanus* and *Ancylostoma duodenale*),  
71 primarily affect impoverished communities in (sub)tropical countries [1-3]. It was estimated  
72 that 24% of the global population is affected by at least one of these STHs, resulting in a total  
73 loss of 1.9 million disability-adjusted life years in 2019 [4, 5]. In response to this public health  
74 issue, many STH-endemic countries have implemented national school-based deworming  
75 programs, providing periodic oral anthelmintic treatment to the children at the schools in  
76 the program [6-8]. The pharmaceutical industry's contribution of more than 6.5 billion  
77 anthelmintic tablets for at-risk populations since 2016 has undoubtedly contributed to  
78 reducing the disease burden in various STH-endemic countries [9, 10].  
79 Encouraged by this progress, World Health Organization (WHO) has published its roadmap  
80 for STHs for the next decade (2020 – 2030), encompassing six ambitious targets (**Table 1**) [7,  
81 11]. To advance towards the first two targets, it will be critical to periodically assess the STH  
82 infection prevalence, of both any intensity and moderate-to-heavy intensity (MHI) infections.  
83 The prevalence of any intensity STH infection is deployed as a parameter to determine the  
84 frequency of deworming (**Target #2**), while the elimination as a public health problem is  
85 defined when prevalence of MHI infections is less than 2% (**Target #1**) [7].

86 **Table 1. The six 2030 targets and corresponding milestones put forward by the WHO [7].**

| Target                                                                                                        | Milestone                                                                |
|---------------------------------------------------------------------------------------------------------------|--------------------------------------------------------------------------|
| #1 Achieve and maintain elimination of STH morbidity in pre-school-aged and school-aged children              | 98 countries with <2% children with MHI infections                       |
| #2 Reduce the number of tablets needed for large-scale deworming programs for STHs                            | 50% reduction                                                            |
| #3 Increase domestic financial support to deworm STHs                                                         | 25 countries deworming children by domestic funds                        |
| #4 Establish an efficient STH control program in adolescent, pregnant and lactating women of reproductive age | Coverage equals 75%                                                      |
| #5 Establish an efficient strongyloidiasis control program in school-aged children                            | 75% of the children at risk of <i>Strongyloides</i> receiving ivermectin |
| #6 Ensure universal access to at least basic sanitation and hygiene by 2030 in STH-endemic areas              | Reduce open defecation to 0%                                             |

87

88 Microscopic examination of a stool smear using the Kato-Katz (KK) thick smear technique and  
89 manual counting of STH eggs remain the recommended diagnostic standard for  
90 epidemiological surveys designed to inform large-scale deworming programs [7, 12, 13].  
91 While KK thick smear is the sole diagnostic method mentioned in the 2030 targets for STHs  
92 [7], this diagnostic tool has some significant pitfalls: test results are prone to human error; it  
93 lacks clinical sensitivity when the intensity of infections is low, and hookworm eggs disappear  
94 when smears are not examined within 1h following preparation of the smear [14-17]. Within  
95 the last two decades, a variety of alternative diagnostic tools have been developed or  
96 repurposed, and subsequently evaluated for the diagnosis of STH infections in children [13,  
97 18-21]. Despite improved clinical sensitivity for some diagnostic tools [15, 16], their  
98 integration into national deworming programs has been challenging due to labour-intensive  
99 procedures and resource demands [22]. Furthermore, as programs progress toward STH  
100 control and elimination, clinical specificity becomes increasingly more important [23]. Indeed,  
101 in the WHO's target product profiles (TPPs) for new diagnostic tools to monitor large-scale  
102 deworming programs against STHs, the clinical sensitivity can drop to 60%, while the clinical  
103 specificity should be at least 94% [24]. The high clinical specificity of KK thick smear ( $\geq 95$ ) [16,

104 25, 26] remains a strong advantage, reinforcing its likely role as a reference diagnostic for the  
105 next decade. While KK thick smear is likely to remain crucial, ongoing research and  
106 innovations in diagnostic technology show promise to address its limitations and contribute  
107 to more effective STH monitoring and control strategies [27, 28].

108 A clear opportunity lies in the automation of the egg counting, the step which is most prone  
109 to human error, laborious and time-demanding (egg counting takes 80% of the time-to-result,  
110 including data entry) [22]. We prototyped a proof-of-concept artificial intelligence-based  
111 digital pathology (AI-DP) device and demonstrated it for automated scanning and detection  
112 of STH eggs in KK thick smears [27]. Today, this AI-DP offers (i) electronic data capturing (EDC),  
113 (ii) whole slide imaging (WSI), (iii) an AI model and according AI development pipeline, (iv) AI  
114 results verification, and (v) a cloud-based reporting and monitoring dashboard that can be  
115 integrated into existing health systems (see also **Fig 1**). With encouraging preliminary results  
116 and field testing, a comprehensive prospective, in-the-field evaluation of the AI-DP is urgently  
117 needed to provide the necessary data for health decision makers to make an evidence-based  
118 decision on whether this technology can be recommended to inform large-scale deworming  
119 programs against STHs.

120 Here, we describe the study protocol for a comprehensive evaluation of an AI-DP based on its  
121 (i) diagnostic performance, (ii) repeatability/reproducibility, (iii) time-to-result, (iv) cost-  
122 efficiency to inform large-scale deworming programs, and (v) usability both in a laboratory  
123 and field setting. For each of these five attributes, separate experiments were designed to  
124 test the hypothesis that the AI-DP (KK2.0) is non-inferior when compared to the manual  
125 screening of the KK smears (KK1.0). The field work will be conducted in two STH endemic  
126 countries with a national deworming program (Ethiopia and Uganda), focussing on school-  
127 age children (SAC) only. Through the dissemination of our methodology and statistics, we also

128 hope to support additional developments in any AI-DP technologies for other neglected  
129 tropical diseases in resource-limited settings.

130

## 131 **Methods**

### 132 **1 Ethics statement**

133 The study protocol will be submitted to the institutional review boards of the Faculty of  
134 Medicine and Health Sciences of Ghent University (Belgium), the Health Institute of Jimma  
135 University (Ethiopia), the Vector Control Division Research Ethics committee (Uganda), and  
136 the Uganda National Council of Science and Technology for both review and approval.  
137 Parent(s)/guardian(s) of the participants will sign an informed consent document indicating  
138 that they understand both the purpose, and the procedures required for the study, and that  
139 they are willing to have their child participate in the study. If the child is  $\geq 6$  years old, he/she  
140 will have to orally assent to participate in the study. Participants  $\geq 8$  years old ( $\geq 12$  years old  
141 in Ethiopia) will only be included if they sign an assent form indicating that they understood  
142 both the purpose of the study and the procedures required for the study, and they are willing  
143 to participate in the study. Every child that tests positive on KK1.0 or whose stool sample  
144 undergoes the egg spiking procedure will receive a single oral dose of 400 mg albendazole or  
145 500 mg mebendazole in case of STH infections, and 40 mg/kg body weight praziquantel in  
146 case of *Schistosoma mansoni* infections. If the presence of eggs other than STHs and *S.*  
147 *mansoni* is confirmed, children will be referred to the nearest health centre.

148 The use of collected data will be strictly limited to the research objectives outlined in this  
149 study, and to enhance the accuracy and reliability of the AI diagnostic tool in identifying and  
150 diagnosing STHs. The study will adhere to the highest ethical standards, ensuring participant



- 151 privacy and data protection. All data will be treated with strict confidentiality, and measures
- 152 will be implemented to anonymize the data to ensure participant anonymity.

## 153 2 Study population and study sites

154 The study will focus on SAC (age 5 – 14) only, since they are the major target of large-scale  
155 deworming programs against STHs [6]. We will apply the inclusion and exclusion criteria  
156 summarized in **Table 2**. These criteria have been adapted from criteria standardized and  
157 applied throughout a series of drug efficacy trials [29].

158 **Table 2. Inclusion and exclusion criteria that will be endorsed during the recruitment of**  
159 **participants (adapted from [29]).**

| Inclusion criteria                                                                                                                                                                                                                                                                                                                                                                                                                                                                                                                                                                                                                                                                                                                                                               | Exclusion criteria                                                                                                                                                                                                                                                                                                                                                 |
|----------------------------------------------------------------------------------------------------------------------------------------------------------------------------------------------------------------------------------------------------------------------------------------------------------------------------------------------------------------------------------------------------------------------------------------------------------------------------------------------------------------------------------------------------------------------------------------------------------------------------------------------------------------------------------------------------------------------------------------------------------------------------------|--------------------------------------------------------------------------------------------------------------------------------------------------------------------------------------------------------------------------------------------------------------------------------------------------------------------------------------------------------------------|
| <ul style="list-style-type: none"><li>• Subject, male or female, is 5-14 years of age</li><li>• Parent(s)/guardian(s) of subject signed an informed consent document indicating that they understand the purpose and procedures required for the study and that they are willing to have their child participate in the study</li><li>• Subject of <math>\geq 6</math> years old has orally assented to participate in the study</li><li>• Subject of <math>\geq 8</math> (Uganda) / <math>\geq 12</math> (Ethiopia) years old has signed an assent form indicating that they understand the purpose of the study and procedures required for the study, and are willing to participate in the study*</li><li>• Subject has provided a stool sample of minimum 5 grams</li></ul> | <ul style="list-style-type: none"><li>• Subject has active diarrhoea (defined as the passage of 3 or more loose or liquid stools per day)</li><li>• Subject is experiencing a severe concurrent medical condition or has an acute medical condition</li><li>• Subject has received anthelmintic treatment within 90 days prior to the start of the study</li></ul> |

160 \*These differences in inclusion criteria are due to differences in national policies.

161

162 The study will be conducted in both Ethiopia and Uganda. The selection of these countries  
163 and the corresponding partners (Ethiopia: Jimma University; Uganda: Vector Control and  
164 Neglected Tropical Diseases Division, Ministry of Health of Uganda) were based on ongoing  
165 collaborations [20, 29-36], the presence of an STH control program (Ethiopia: since 2015;  
166 Uganda: since 2003), and the availability of recent data on both the prevalence and intensity  
167 of STH infections [31, 32, 37]. Finally, both countries operate differently, allowing AI-DP  
168 evaluation in a fully equipped laboratory (Jimma University, Ethiopia) and a field setting (VCD,  
169 Uganda) that best mimic monitoring and evaluation (M&E) activities as part of the national

170 STH deworming program. In Ethiopia, the study will be conducted in Jimma Zone, Oromia  
171 Regional state. In Uganda, the study will be conducted in the district of Central Uganda. The  
172 schools will be selected based on previously available data, to ensure sufficient STH cases.

173

### 174 **3 Processing KK thick smears with our AI-DP (KK2.0)**

175 Processing KK thick smears with the AI-DP (KK2.0) is graphically illustrated in **Fig 1**. To facilitate  
176 study management, the AI-DP enables EDC for registering study participants (**step 1**) and  
177 provides QR printing spreadsheets and QR label templates. Once the KK thick smears are  
178 prepared (with QR code on the slide) (**step 2**), the scanning process is initiated (**step 3**). This  
179 involves manually loading of the smears into the scanner using a specialized slide holder, after  
180 which the QR code is read, and boundary of the stool smear is determined. If required, the  
181 user is prompted to manually adjust the scan boundary. In a next step, the slide is  
182 automatically scanned, and the scanner captures focus stacks, saving eight images at every  
183 field-of-view (FOV) within the KK thick smear (**step 3**). Following slide scanning, images are  
184 transferred to the Slide Manager, and FOVs are analyzed by the AI model for the detection,  
185 classification, and quantification of helminth eggs (**step 4**). In a final step, the results  
186 generated by the AI undergo review and verification (**step 5**). This is done through the  
187 EggInspector tool, presenting all the AI-determinants from a slide to a trained verifier.

188

189 **Fig 1. An overview of how Kato-Katz (KK) thick smears are processed with the AI-DP (KK2.0).**

190 AI: artificial intelligence, KK: Kato-Katz. Figure created using BioRender.com.

## 191 **4 The experiments to comprehensively evaluate KK2.0**

192 This comprehensive evaluation consists of five experiments, each one designed to evaluate  
193 one of the five attributes: (i) diagnostic performance, (ii) repeatability/reproducibility, (iii)  
194 time-to-result, (iv) cost-efficiency to inform large-scale deworming programs, and (v) usability  
195 in both a laboratory and field setting. **Table 3** provides an overview of the hypotheses, the  
196 primary and secondary outcomes for each experiment separately. Across these five  
197 experiments, we defined 9 hypotheses, 13 primary and 17 secondary outcomes. Generally,  
198 we hypothesize that KK2.0 is non-inferior to KK1.0. Note that a hypothesis was not defined  
199 for both the time-to-result and usability experiments. This was because the outcomes of the  
200 time-to-result experiment will feed into the experiment on cost-efficiency and because the  
201 usability experiment was designed to gain insights into how we can further improve the  
202 usability of KK2.0 only. In the following sections we will discuss each experiment in detail. The  
203 sample size calculation and the statistical data analysis will be discussed in **sections 2.5.** and  
204 **2.6,** respectively.

205

**Table 3. An overview of the hypotheses, primary, and secondary outcomes to comprehensively evaluate KK2.0.**

| Experiment                             | Hypotheses                                                                                                                                                            | Primary outcomes                                                                                                                              | Secondary outcomes                                                                                                                                                                                                                                                                                                              |
|----------------------------------------|-----------------------------------------------------------------------------------------------------------------------------------------------------------------------|-----------------------------------------------------------------------------------------------------------------------------------------------|---------------------------------------------------------------------------------------------------------------------------------------------------------------------------------------------------------------------------------------------------------------------------------------------------------------------------------|
| 1) Diagnostic performance              | <b>H1.1</b> the clinical sensitivity of KK2.0 to detect low intensity infections is non-inferior to that of KK1.0 for <i>Ascaris</i> , <i>Trichuris</i> and hookworms | <b>P1.1</b> the clinical sensitivity of KK2.0 and KK1.0 to detect low intensity infections of <i>Ascaris</i> , <i>Trichuris</i> and hookworms | <b>S1.1</b> the clinical sensitivity and clinical specificity of KK1.0 and KK2.0 to detect <i>S. mansoni</i> infections                                                                                                                                                                                                         |
|                                        | <b>H1.2</b> the clinical sensitivity of KK2.0 to detect MHI infections is non-inferior to that of KK1.0 for <i>Ascaris</i> , <i>Trichuris</i> and hookworms           | <b>P1.2</b> the clinical sensitivity of KK2.0 and KK1.0 to detect MHI infections of <i>Ascaris</i> , <i>Trichuris</i> and hookworms           | <b>S1.2</b> the detection limit (the lowest number of eggs that yields a positive test result in 95% of the cases) for both KK1.0 and KK2.0, and <i>Ascaris</i> , <i>Trichuris</i> , hookworm, and <i>S. mansoni</i> separately                                                                                                 |
|                                        | <b>H1.3</b> the clinical specificity of KK2.0 to detect any intensity infections is non-inferior to that of KK1.0 for <i>Ascaris</i> , <i>Trichuris</i> and hookworms | <b>P1.3</b> the clinical specificity of KK2.0 and KK1.0 to detect any intensity infections of <i>Ascaris</i> , <i>Trichuris</i> and hookworms | <b>S1.3</b> the egg recovery rate of KK1.0 and KK2.0 when compared to the ground truth for <i>Ascaris</i> , <i>Trichuris</i> , hookworms and <i>S. mansoni</i>                                                                                                                                                                  |
|                                        | <b>H1.4</b> the clinical specificity of KK2.0 to detect MHI infections is non-inferior to that of KK1.0 for <i>Ascaris</i> , <i>Trichuris</i> and hookworms           | <b>P1.4</b> the clinical specificity of KK2.0 and KK1.0 to detect MHI infections of <i>Ascaris</i> , <i>Trichuris</i> and hookworms           | <b>S1.4</b> the clinical sensitivity and clinical specificity of the AI-DP when the AI verification process is simplified (limited selection of AI objects presented for verification) or even omitted                                                                                                                          |
| 2) Repeatability and re-productibility | <b>H2.1</b> the repeatability and the reproducibility of the scanning process is at least 99%                                                                         | <b>P2.1</b> the repeatability and the reproducibility of the scanning process                                                                 | <b>S2.1</b> the agreement between repeated egg counts for <i>Ascaris</i> , <i>Trichuris</i> and <i>S. mansoni</i>                                                                                                                                                                                                               |
|                                        | <b>H2.2</b> the repeatability and the reproducibility of AI verification process is at least 99%                                                                      | <b>P2.2</b> the repeatability and the reproducibility of the AI verification process                                                          | <b>S2.2</b> the repeatability and reproducibility in test results when the AI verification process is simplified (limited selection of AI objects presented for verification) or even omitted                                                                                                                                   |
|                                        | <b>H2.3</b> the repeatability and the reproducibility of KK2.0 is at least 99%                                                                                        | <b>P2.3</b> the repeatability and the reproducibility of the KK2.0                                                                            | <b>S2.3</b> the repeatability and the reproducibility of KK1.0                                                                                                                                                                                                                                                                  |
| 3) Time-to-result                      | We did not define any hypotheses, as the outcomes of this experiment will feed into the experiment on cost-efficiency ( <b>section 2.3.4</b> )                        | <b>P3.1</b> time-to-result for KK2.0                                                                                                          | <b>S3.1</b> time for participant registration using EDC tools and QR printing<br><b>S3.2</b> the correlation between time-to-result and <i>Ascaris</i> , <i>Trichuris</i> and <i>S. mansoni</i> egg counts recorded by KK2.0<br><b>S3.3</b> time-to-result of the AI-DP when the AI verification process is simplified (limited |

|                    |                                                                                                                                                                                                                                                                                        |                                                                                                                                                                                                                                                                                                                                                                                                                                                                                                             |                                                                                                                                                                                                                                                                                                                                                                                                                                                                                                                                                                                                                                                                                                                                                                                                                                                                                                                                         |                                                                     |
|--------------------|----------------------------------------------------------------------------------------------------------------------------------------------------------------------------------------------------------------------------------------------------------------------------------------|-------------------------------------------------------------------------------------------------------------------------------------------------------------------------------------------------------------------------------------------------------------------------------------------------------------------------------------------------------------------------------------------------------------------------------------------------------------------------------------------------------------|-----------------------------------------------------------------------------------------------------------------------------------------------------------------------------------------------------------------------------------------------------------------------------------------------------------------------------------------------------------------------------------------------------------------------------------------------------------------------------------------------------------------------------------------------------------------------------------------------------------------------------------------------------------------------------------------------------------------------------------------------------------------------------------------------------------------------------------------------------------------------------------------------------------------------------------------|---------------------------------------------------------------------|
|                    |                                                                                                                                                                                                                                                                                        |                                                                                                                                                                                                                                                                                                                                                                                                                                                                                                             |                                                                                                                                                                                                                                                                                                                                                                                                                                                                                                                                                                                                                                                                                                                                                                                                                                                                                                                                         | selection of AI objects presented for verification) or even omitted |
| 4) Cost-efficiency | <p><b>H4.1</b> the cost-efficiency of KK2.0 to make a reliable program stopping decision is non-inferior to that of KK1.0</p> <p><b>H4.2</b> the cost-efficiency of KK2.0 to reliably declare that STHs are eliminated as a public health problem is non-inferior to that of KK1.0</p> | <p><b>P4.1</b> the total survey cost to reliably inform a stop decision the program for KK2.0 and KK1.0</p> <p><b>P4.2</b> the total survey cost to reliably inform a declaration that STH are eliminated as a public health problem for KK2.0 and KK1.0</p>                                                                                                                                                                                                                                                | <p><b>S4.1</b> the total survey cost to make reliable program decisions on the frequency of large-scale deworming programs for KK2.0 and KK1.0</p> <p><b>S4.2</b> the total survey cost to reliably monitor the therapeutic drug efficacy of anthelmintic against STHs for KK2.0</p> <p><b>S4.3</b> the total survey cost to make reliable program decisions on the frequency of large-scale deworming programs for KK2.0 when the AI verification process is simplified (limited selection of AI objects presented for verification) or even omitted</p> <p><b>S4.4</b> the required performance of AI to make reliable program decisions on the frequency of large-scale deworming programs for KK2.0</p> <p><b>S4.5</b> the optimal set-up for KK2.0 (sample throughput; number of AI-DP devices; number of operators) to inform large-scale deworming programs when deployed in a fully equipped laboratory and M&amp;E setting</p> |                                                                     |
| 5) Usability       | For this experiment, we did not define any hypotheses                                                                                                                                                                                                                                  | <p><b>P5.1</b> ease-of-use/ease-of-learning of (i) the training (ii) the setup, (iii) the scanning, and (iv) the AI verification process for the identified end-users</p> <p><b>P5.2</b> efficiency of (i) the training (ii) the setup, (iii) the scanning, and (iv) the AI verification process for the identified end-users</p> <p><b>P5.3</b> satisfaction/low user burden of (i) the training (ii) the setup, (iii) the scanning, and (iv) the AI verification process for the identified end-users</p> | <p><b>S5.1</b> identification of other barriers/facilitators for (i) the training (ii) the setup, (iii) the scanning, and (iv) the AI verification process by the identified end-users</p> <p><b>S5.2</b> other comparative metrics such as task completion time and rates, error rates, and success rates</p>                                                                                                                                                                                                                                                                                                                                                                                                                                                                                                                                                                                                                          |                                                                     |

## 208 4.1 Diagnostic performance

209 **Fig 2** provides an overview of the proposed study design for the experiment on the diagnostic  
210 performance. Generally, this experiment consists of five consecutive steps, with the second  
211 step offering two methods to validate diagnostic performance. The first method involves  
212 verifying egg counts by reviewing and counting all eggs within the captured FOVs. The second  
213 method entails spiking a minimum number of eggs into randomly selected stool samples to  
214 achieve counts indicating an MHI infection. In the **first step** of the experiment, fresh stool  
215 samples will be collected from SAC at the schools. In the **second step**, the consistency of the  
216 stool samples will be scored based on the Bristol Stool Chart [38]. Subsequently, sample will  
217 be homogenised, and one KK thick smear per sample will be prepared in one of the two  
218 following ways for the two validation methods described above. For FOV-based validation  
219 (**step 2A**), samples will be processed as recommended by WHO. For egg spiking-based  
220 validation (**step 2B**), the cone of stool (after removing the KK template) will be spiked with  
221 purified eggs to artificially increase the egg counts to at least an MHI infection (*Ascaris*: >209  
222 eggs; *Trichuris*: >42 eggs; hookworms: >84 eggs). This step 2B will only be done in a subset of  
223 the samples (never on samples that are processed through 2A) and is introduced to ensure  
224 that sufficient cases of MHI infections for each of the STHs are obtained (see also **section 2.5**).  
225 The selection of the samples to be spiked will be done through a randomization process. In  
226 the **third step** and following a smear clearing time of 30 min, the smears will be randomly  
227 allocated to be analysed by either KK1.0 (even participant ID) or KK2.0 (odd participant IDs).  
228 This randomization process is required to avoid systematic bias due to hookworm egg  
229 degradation over time [13, 14, 39]. In the **fourth step**, egg counts will be recorded for each  
230 helminth species (*Ascaris*, *Trichuris*, hookworm and *S. mansoni*), separately. Thereafter (**step**  
231 **5**), KK thick smears will be stored at 4°C to be used in the context of the experiment on

232 reproducibility/repeatability (see **section 2.4.2**). In Ethiopia, sample processing (from step 2  
233 onwards) will be conducted in the Neglected Tropical Disease Laboratory of Jimma University  
234 (a fully equipped laboratory setting), while in Uganda all steps will be conducted on-site (M&E  
235 setting).

236

237 **Fig 2. Overview of the study design for the experiment on diagnostic performance.** FOV:  
238 field-of-view, KK: Kato-Katz. Figure created using BioRender.com.

239

240 In absence of a gold standard, it will be important to define the ground truth for each slide  
241 separately, to test the hypotheses (H1.1 – H.1.4). For the slides that were not spiked, all FOVs  
242 that were captured through the AI-DP will be manually annotated by one trained laboratory  
243 technician. A second trained laboratory technician will then verify the annotations. In case of  
244 disagreement, a third trained laboratory technician will make the final call. For the spiked  
245 samples, the ground truth (samples being classified as MHI infection) is already established  
246 through the process of spiking.

247

## 248 **4.2 Repeatability and reproducibility**

249 In this experiment, we will be evaluating the two parameters repeatability and  
250 reproducibility. Repeatability refers to the variability in test results (*Ascaris*, *Trichuris* and *S.*  
251 *mansoni*) when the same KK thick smear is examined by the same operator (e.g. scanner of  
252 AI-DP/microscopist), so called intra-annotator agreement, while reproducibility refers to the  
253 variability in test results when the same slide is examined by a different operator (e.g. scanner  
254 of AI-DP/microscopist), so called inter-annotator agreement (see also **Fig 3** for graphic  
255 definition of both repeatability and reproducibility). For KK2.0, we will focus on the scanning



256 process (step 3 in **Fig 1**) and the AI verification process (step 5 in **Fig 1**). For KK1.0, we will  
257 focus on the egg counting process only (see also **Fig 3**). Generally, we hypothesise that both  
258 the repeatability and reproducibility of KK2.0 is at least 99%.

259 **Fig 3** provides an overview of the proposed study design for the experiment on the  
260 repeatability and reproducibility. For this experiment, we will use a subset of the KK thick  
261 smears prepared during the experiment on the diagnostic performance. The subset will  
262 comprise two slide boxes, each containing 45 KK thick smears. To ensure we assess the  
263 repeatability and reproducibility across different egg counts, we will randomly select 30  
264 negative KK thick smears, 30 smears with a total egg count for any helminths (*Ascaris*,  
265 *Trichuris* and *S. mansoni*) between 1 and 100, and 30 smears with a total egg count greater  
266 than 100, resulting in a total of 90 smears. We will ensure that at least 50% of the KK thick  
267 smears in each box contain eggs from at least two different helminth species.

268 For the repeatability and reproducibility of the scanning process (KK2.0), all KK thick smears  
269 in slide box #1 (green) and box #2 (blue) will undergo two rounds of scanning. To ensure the  
270 entire sample is scanned, boundaries will be set larger than the smear for every scan, limiting  
271 interference and error caused by human error. The repeatability and reproducibility of the  
272 scanner process will be based on the final test results generated by the complete scanning  
273 process, which includes slide loading, boundary setting, device calibration, automatic focus  
274 setting, scan algorithms, AI detections and egg grouping algorithms. For the repeatability and  
275 reproducibility of the result verification process, the AI results of the unique scans of scanner  
276 #1 (red frame) will be verified by at least two different microscopists. For KK1.0, the  
277 examination of the KK thick smears will be conducted using the same flow as applied for the  
278 AI verification process. We will ensure that the same microscopists examine the same slides  
279 for both KK1.0 and do the AI verification for KK2.0.

280

281 **Fig 3.** Overview of the study design for the experiment on the repeatability and  
282 reproducibility. Figure created using BioRender.com.

### 283 **4.3 Time-to-result**

284 During the experiments on the diagnostic performance (**section 2.4.1**), and repeatability and  
285 reproducibility (**section 2.4.2**), four different steps of the KK2.0 procedure will be timed. The  
286 four steps involve (i) participant registration (step 1 in **Fig 1**), (ii) the scanning process (step 3  
287 in **Fig 1**), (iii) the AI process (step 4 in **Fig 1**), and (iv) the verification process (step 5 in **Fig 1**).  
288 The time required for each of these steps to be completed will be recorded by the AI-DP. The  
289 total time-to-result will be defined as the sum of the durations needed for the individual steps.  
290 Furthermore, in the Ugandan field setting, the time for setting up the AI-DP system at the  
291 different field locations will be recorded. The time-to-result for KK1.0 will not be measured in  
292 the present study. This has been intensively researched elsewhere as part of four clinical  
293 trials, each trial conducted in a different country [29, 40]. We will use these data as a  
294 comparator for KK2.0.

295

### 296 **4.4 Cost-efficiency**

297 For this experiment, we built up on two general frameworks that were previously developed  
298 to support cost-efficient study design choices for large-scale STH deworming programs,  
299 including epidemiological surveys to reduce/stop large-scale deworming programs and to  
300 declare STH eliminated as a public health problem [41, 42], and to monitor the therapeutic  
301 drug efficacy [22]. Generally, these frameworks consist of three consecutive steps. In the **first**  
302 **step**, an in-depth analysis of the operational costs to process one stool sample is conducted  
303 for each diagnostic tool. In the **second step**, simulation studies are performed to determine  
304 the probability of making the reliable program decision. In the **third step**, the outcome of the  
305 cost assessment is integrated into the simulation study to estimate the total survey costs and  
306 determined the most cost-efficient study design. For the in-depth analysis of the operational

307 costs to process one sample, we will both conduct an itemized cost assessment and  
308 determine the salary costs, which will be a function of the time-to-result (see **section 2.4.3**).  
309 For the simulation, we will deploy simulation frameworks previously published by both  
310 Kazienga et al. (2023) and Coffeng et al. (2023) [22, 41]. Both frameworks account for different  
311 sources of variation in egg counts, including (i) variability in mean egg intensity between  
312 schools; (ii) inter-individual variability in mean egg intensity due to variation in infection levels  
313 between individuals, where the level of aggregation is a linear function of the school-level  
314 mean egg intensity; (iii) day-to-day variability in mean egg intensity within an individual due  
315 to heterogeneous egg excretion over time; (iv) variability in egg counts between repeated  
316 aliquots of a stool sample due to the aggregated distribution of eggs in stool; (v) inter-  
317 individual variability in the effect of drug administration. Through the outputs of the  
318 experiment on both the diagnostic performance (**section 2.4.1**), and the repeatability and  
319 reproducibility (**section 2.4.2**), we will be able to further customize the simulation work to  
320 KK2.0 (e.g., additional variation in test results due to AI verification process and imperfect egg  
321 recovery).  
322

## 323 **4.5 Usability**

324 We define usability as the degree to which the KK2.0 can be used easily, efficiently, and with  
325 satisfaction/low user burden by the stakeholders [43]. For this experiment, KK2.0 naïve  
326 participants (having no previous exposure or experience with the system) will receive  
327 practical training in the use of the KK2.0 system, which includes three steps, namely the set-  
328 up, the scanning, and the AI verification process.

329 The practical training consists of an initial demonstration of this three-step process and a  
330 walk-through of system user manuals. Afterwards, the participants will be invited to two  
331 natural use environments, either to a laboratory setting, or a field setting. The participants  
332 will be organized into four groups per setting, each consisting of two participants per group,  
333 resulting in a total of 16 participants. This grouping reflects a planned real-life group setup,  
334 wherein the involvement of two laboratory technicians are expected to carry out the tasks.  
335 The group will be asked to perform the set-up as a team. The two following steps, the scanning  
336 and verifying AI, will be performed individually. For this, participants will be asked to each  
337 process 6 slides with KK2.0. Each slide will be processed in following order, whereby the  
338 participant's effort will be increased: (1) the final results are available soon after scanning is  
339 complete (e.g., KK2.2 results), (2) the user must perform the simple verification procedure  
340 before the results are available, (3) the user must perform the complete verification  
341 procedure before the results are available. During the three-step task performance,  
342 participants will verbalize their experiences and detect weak points in their interaction with  
343 the scanner (i.e., think-aloud protocol [44]). The whole session will be video-recorded, and  
344 data will be generated by verbatim transcriptions, and an observation checklist for collecting  
345 comparative metrics (e.g., task completion time and both error and success rates). Following,  
346 a semi-structured interview will be implemented to capture the ease-of-use/ease-of-learning,

347 efficiency, and satisfaction/low user burden, as well as potentially missed barriers and  
348 facilitators during the task completion process. The interviews will be conducted by one  
349 investigator and structured around four sections: the background of the participant; the  
350 training; the KK2.0; the context. The data will be audio-recorded and transcribed verbatim.

351

## 352 **5 Sample size calculation**

353 A formal sample size calculation was conducted for the experiments on the diagnostic  
354 performance (**section 2.4.1**), and the repeatability and reproducibility (**section 2.4.2**). For the  
355 other experiments we did not determine the sample size, because either no hypothesis was  
356 defined as the outcomes will feed into another experiment (**section 2.4.3 Time-to-result**), the  
357 hypothesis is based on a simulation study (**section 2.4.4 Cost efficiency**), or the sample size  
358 was based on common practice in literature (**2.4.5. Usability**). In the following sections we  
359 will only briefly discuss the applied methodology to determine the sample size for the three  
360 experiments (diagnostic performance, repeatability/reproducibility, and usability). For a  
361 detailed description of the applied methodology for the first two experiments we refer the  
362 reader to **S1 Info**.

363

### 364 **5.1 Diagnostic performance, repeatability, and reproducibility**

365 Generally, we opted to conduct a series of simulation studies over the standard sample size  
366 methodologies, as this approach allowed us (i) to better capture the variation in test results  
367 that are otherwise difficult to account for (e.g., clinical sensitivity of KK1.0 increases as a  
368 function of egg numbers in a slide), and (ii) to ensure that the sample size calculation and the  
369 final interpretation of the field data are both based on the same statistical approach (e.g., the

370 relative position of confidence intervals (CI) to predefined set of values; see also **Fig 4**). In  
371 brief, each of these simulation studies consists of a series of in-silico experiments that are  
372 iterated under different conditions (e.g., different sample sizes). Based on this iterative  
373 process, we determined the lowest sample size that allowed for confirming the hypothesis in  
374 at least 80% of the iterations (= power).

375

376 **Fig 4. Overview of the different outcome scenarios based on a random sample and its**  
377 **corresponding CI.** This figure illustrates the different outcome scenarios around the  
378 difference in performance between KK2.0 and KK1.0 based on the CI. The green lines  
379 represent the scenarios where there is evidence of non-inferiority, while the lines in orange  
380 illustrate the scenarios where there is no evidence of non-inferiority. In this example we set  
381 the level of equivalence at -5 percent difference between (KK2.0 – KK1.0), a negative value  
382 indicating that KK1.0 is better.

383

#### 384 **5.1.1 Diagnostic performance**

385 For the clinical sensitivity to detect low intensity (**H1.1**) and MHI infections (**H1.2**), we  
386 accounted for (i) a varying clinical sensitivity as a function of the number of eggs in a slide; (ii)  
387 a proportion of the eggs in a slide being missed, (iii) correlation between test results of KK1.0  
388 and KK2.0 on the same slide, (iii) and helminth specific FEC thresholds defining low intensity  
389 and MHI infections (**Table 4**). In this simulation, we assumed that the clinical sensitivity of  
390 KK2.0 is equal to that of KK1.0 and an equivalence level of 5-point percent. In other words,  
391 the lower limit of the CI around the difference (KK2.0 – KK1.0) should be at least -5% (see also  
392 **Fig 4**). As we will draw conclusions on three different STHs at the same time and because we  
393 are testing for non-inferiority, we set the level of significance at 0.05/3.

394

395 **Table 4. The FEC thresholds defining low intensity and MHI STH infections.** This table  
396 summarizes the WHO FEC (in EPG) thresholds to classify the intensity of STH infections into  
397 low, moderate and heavy [45].

| Helminth         | Low       | Moderate       | Heavy   |
|------------------|-----------|----------------|---------|
| <i>Ascaris</i>   | 1 – 4,999 | 5,000 – 49,999 | ≥50,000 |
| <i>Trichuris</i> | 1 – 999   | 1,000 – 9,999  | ≥10,000 |
| Hookworm         | 1 – 1,999 | 2,000 – 3,999  | ≥4,000  |

398

399 Based on these assumptions, the required number of KK thick smears representing low  
400 intensity infections based on the ground truth is 125 for *Ascaris*, 180 for *Trichuris* and 140 for  
401 hookworms. The required number of KK thick smears representing MHI infections based on  
402 the ground truth, is 110 for *Ascaris* and 145 for *Trichuris*. For hookworms, the required sample  
403 size exceeded 350, which revealed to be beyond the capacity of this project.

404 For the clinical specificity to detect any intensity (**H1.3**) and MHI infections (**H1.4**), we used  
405 another data generation process (based on binary test results (positive/negative) instead of  
406 egg counts). Because of this, the required sample size is the same for each of the different  
407 STHs. In this simulation study, we also (i) accounted for correlation between test results of  
408 KK1.0 and KK2.0 on the same KK thick smear, (ii) assumed an equal clinical specificity for both  
409 diagnostic tools, an equivalence level of 5-point percent, and (iii) set the level of significance  
410 at 0.05/3. Based on these assumptions, the required number of KK thick smears representing  
411 no infections based on the ground truth is 225 for *Ascaris*, *Trichuris* and hookworms each.  
412 Consequently, the required number of KK thick smears representing low intensity infections  
413 based on the ground truth is also 165 for each of the three STHs separately.

414



### 415 **5.1.2 Repeatability and reproducibility**

416 To verify whether the repeatability and reproducibility for the scanner set-up (**H2.1**), the AI  
417 verification process (**H2.2**), and the complete KK2.0 (**H2.3**), is at least 99%, we conducted a  
418 simulation study where we determined the number of KK thick smears that resulted in a lower  
419 limit of the CI that is at least 95% in 80% (= power) of the iterations when the true underlying  
420 probability of success equals 99%. Given that we are testing both repeatability and  
421 reproducibility at same time for each process, and that we are testing for non-inferiority, we  
422 set the level of significance at 0.05/2. Based on these assumptions the, required KK thick  
423 smears that need to be re-processed equals 90 for each of the three hypotheses.

424

### 425 **5.2 Usability**

426 In this experiment, we will include 16 participants to receive (i) practical training and engage  
427 in the three-step process (ii – iv) and usability testing. A group size of 3-20 participants is  
428 considered valid in such problem discovery scenarios, with 5-10 participants being a sensible  
429 baseline range [46]. The group size should typically be increased along with the study's  
430 complexity and the criticality of its context. Since the study will take place in two different  
431 settings, either in a well-equipped laboratory or field setting, we considered 8 participants per  
432 setting, resulting in a total of 16 participants (4 groups of 2 participants per setting).

433 Table 5. Overview of the required number of KK thick smear to test the hypotheses for the experiments on diagnostic performance and repeatability/reproducibility.

| Experiment                               | Hypothesis                                                                                                                                                             | Intensity of infection | Number of KK thick smear |                |                  |          |
|------------------------------------------|------------------------------------------------------------------------------------------------------------------------------------------------------------------------|------------------------|--------------------------|----------------|------------------|----------|
|                                          |                                                                                                                                                                        |                        | Any STH                  | <i>Ascaris</i> | <i>Trichuris</i> | Hookworm |
| <b>Diagnostic performance</b>            |                                                                                                                                                                        |                        |                          |                |                  |          |
|                                          | <b>H1.1:</b> the clinical sensitivity of KK2.0 to detect low intensity infections is non-inferior to that of KK1.0 for <i>Ascaris</i> , <i>Trichuris</i> and hookworms | Low                    | –                        | 125            | 180              | 140      |
|                                          | <b>H1.2:</b> the clinical sensitivity of KK2.0 to detect MHI infections is non-inferior to that of KK1.0 for <i>Ascaris</i> , <i>Trichuris</i> and hookworms           | MHI                    | –                        | 110            | 145              | >350     |
|                                          | <b>H1.3:</b> the clinical specificity of KK2.0 to detect any intensity infections is non-inferior to that of KK1.0 for <i>Ascaris</i> , <i>Trichuris</i> and hookworms | No infection           | –                        | 225            | 225              | 225      |
|                                          | <b>H1.4:</b> the clinical specificity of KK2.0 to detect MHI infections is non-inferior to that of KK1.0 for <i>Ascaris</i> , <i>Trichuris</i> and hookworms           | Low                    | –                        | 165            | 165              | 165      |
| <b>Repeatability and reproducibility</b> |                                                                                                                                                                        |                        |                          |                |                  |          |
|                                          | <b>H2.1:</b> the repeatability and the reproducibility of the scanner set-up process is at least 99%                                                                   | All                    | 90                       | –              | –                | –        |
|                                          | <b>H2.2:</b> the repeatability and the reproducibility of AI verification process is at least 99%                                                                      | All                    | 90                       | –              | –                | –        |
|                                          | <b>H2.3:</b> the repeatability and the reproducibility of KK2.0 is at least 99%                                                                                        | All                    | 90                       | –              | –                | –        |

434

435

## 436 6 Statistical data analysis

### 437 6.1 Diagnostic performance

#### 438 6.1.1 Primary outcomes

439 We will draw contingency tables representing the test results of both KK1.0 and KK2.0 for  
440 each type of ground truth (no, low intensity and MHI infections) and STH species (*Ascaris*,  
441 *Trichuris* and hookworms). From these tables, both the clinical sensitivity and specificity, and  
442 the corresponding 95% CI (Wald) will be calculated for each test and STH separately.  
443 Subsequently, we will also calculate the 90% CI around the difference in performance (KK2.0-  
444 KK1.0). Given that test results are paired (same smears are processed by KK1.0 and KK2.0, we  
445 will use the formulae described by Newcombe for paired data [47]. We will conclude that the  
446 clinical sensitivity or specificity of KK2.0 for a particular STH is non-inferior if the lower limit  
447 of the 90% CI does not include the -5-point percent.

448

#### 449 6.1.2 Secondary outcomes

450 We will draw contingency tables representing the test results of both KK1.0 and KK2.0 for  
451 each type of ground truth for *S. mansoni* infections. From these tables, both the clinical  
452 sensitivity and specificity, and the corresponding 95% CI will be calculated (**S1.1**).

453 To determine the detection limit (the lowest number of eggs that yields a positive test result  
454 in 95% of the cases) of KK1.0 and KK2.0 for STH and *S. mansoni* (**S1.2**), logistic regression  
455 models accounting for repeated measures will be built for each helminth species separately  
456 using the 'mixed\_model' function in R. The test result (positive or negative) will be used as  
457 dependent variable while 'test' (2 levels: 'KK1.0', 'KK2.0'), log transformed egg counts based  
458 on ground truth at first examination, Bristol stool scale and all two-way interactions will be

459 used as predicting variables. From these models, we will predict the probability having a  
460 positive test result and the corresponding 95% prediction interval for each integer value of  
461 ground truth egg counts between 1 and 100 using the 'marginal\_coefs' function in R. We will  
462 define the detection limit as that range of egg counts for which the 95% prediction intervals  
463 include 0.95. We will explore the egg recovery rate (= observed egg counts / ground truth egg  
464 counts) of KK1.0 and KK2.0 when compared to the ground truth for *Ascaris*, *Trichuris*,  
465 hookworms and *S. mansoni* (**S1.3**). These analyses will only be conducted on KK thick smears  
466 representing low intensity infections. Finally, we will draw contingency tables representing  
467 the test results of KK2.0 for each type of ground truth (negative, low intensity and MHI  
468 infections) for each helminth species and AI verification process (simplified AI verification  
469 (limited selection of AI objects presented for verification) vs. no AI verification), separately.  
470 From these tables, both the clinical sensitivity and specificity, and the corresponding 95% CI  
471 will be calculated for each helminth species and type of AI-verification process (**S1.4**).

472

## 473 **6.2 Repeatability and reproducibility**

### 474 **6.2.1 Primary outcomes**

475 The egg counts on the same smear will be considered not repeatable/reproducible in one of  
476 the following three scenarios of discrepancy: (i) there is a difference in presence/absence, (ii)  
477 the difference in egg counts exceeds 10 eggs for slides with egg counts  $\leq 100$  eggs, (iii) the  
478 difference in egg counts exceeds 20% eggs for slides with egg counts  $> 100$  eggs. These criteria  
479 are developed by the Swiss Tropical Institute of Tropical and Public Health (Speich et al.,  
480 2015), and are currently the standard way of quality control of egg counts in clinical trials [25,  
481 26].

482 To determine the repeatability (proportion of cases for which a repeated test result by the  
483 same operator/scan met the aforementioned criteria) and reproducibility (proportion of  
484 cases for which a repeated test result by a different operator/scan met the aforementioned  
485 criteria) of the scanning process (**P2.1**) and AI-verification (**P2.2**), we will draw contingency  
486 tables representing the repeated test results of KK2.0 on the same KK thick smears by the  
487 same operator / scanner (repeatability) or different operator / scanner (reproducibility) for  
488 each of the different steps of the KK2.0. From these tables, both the repeatability and  
489 reproducibility, and the corresponding 90% CI (Wald) will be calculated for the scanning  
490 process, AI-verification and complete KK2.0, separately. We will conclude that the  
491 reproducibility/repeatability of these steps are at least 99% if the 90% CI does not include  
492 95%.

493

#### 494 **6.2.2 Secondary outcomes**

495 We will explore the agreement in repeated egg counts by using a Bland-Altman plot for the  
496 scanning process, AI-verification, the complete KK2.0 and KK1.0 for each of the three  
497 helminths, separately (**S2.1**). In addition, we will repeat the analysis of repeatability and  
498 reproducibility for both a simplified AI-result verification process (limited selection of AI  
499 objects presented for verification) and where AI-result verification is omitted (**S2.2**).

500

#### 501 **6.3 Time-to-result**

502 We will determine the mean (and corresponding 95% confidence intervals) time-to-result  
503 (**P3.1**) and the time for participant registration using EDC tools (**S3.1**). In addition, we will also  
504 explore the correlation between time-to-result and *Ascaris*, *Trichuris* and *S. mansoni* egg  
505 counts recorded by KK2.0 (**S3.2**) based on the Spearman's coefficient. Finally, we will repeat

506 the analysis to determine the time-to-result of our AI-DP when the AI verification process is  
507 simplified (limited selection of AI objects presented for verification) and where AI-result  
508 verification is omitted (**S3.3.**)

509

#### 510 **6.4 Cost-efficiency**

511 We refer the reader to **section 2.4.4.2** for more details.

512

#### 513 **6.5 Usability**

514 To achieve a thorough comprehension of the training and scanner usability, we will employ  
515 data triangulation as a method for analysing and incorporating multiple data sources. The  
516 approach to qualitative data analysis will combine inductive and deductive elements, using  
517 the determinants of usability: ease-of-use; efficiency; satisfaction/low user burden. Analytical  
518 categories will be developed from the initial research questions and emerge during the  
519 analysis process. Using NVivo (Version 14, 2020, Lumivero), identified categories will be  
520 operationalized as codes in a flexible coding scheme. The content of the codes will be  
521 discussed extensively between independent coders, and subsequently used to identify pain  
522 points and to explore improvements. The quantitative data obtained through the  
523 observational checklists will be analyzed through basic descriptive statistics.

524

## 525 **Discussion**

526 Despite the well-known limitations of KK thick smear, it is probably here to stay for the next  
527 decade. As response to this, we have designed and developed an AI-DP (KK2.0) that could  
528 overcome some of these limitations. Moreover, by incorporating both EDC tools and cloud-

529 based reporting with a monitoring dashboard that can be integrated into existing health  
530 systems, KK2.0 holds promise as an end-to-end diagnostic tool in large-scale deworming  
531 programs targeting STH. Encouraged by preliminary results on the diagnostic performance,  
532 we now want to provide the data necessary to make more evidence-based decisions on the  
533 potential of this AI-DP.

534

## 535 **1 Comprehensive evaluation beyond diagnostic performance**

536 While the evaluation of new diagnostic methods has often been limited to the clinical  
537 sensitivity and specificity only, we deliberately opted to evaluate additional attributes and  
538 combine them into a simulation study that is designed to determine the cost-efficiency of the  
539 AI-DP to inform large-scale deworming programs. As recently illustrated for monitoring the  
540 therapeutic efficacy against STHs [22], we strongly believe that this holistic approach is  
541 required to make any evidence and value-based decisions. This is particularly relevant for STH  
542 control programs which operate in resource poor settings, and hence it will be important to  
543 ensure reliable and confident programmatic decision making, while minimizing the  
544 operational costs. Moreover, a complex interplay exists between the diagnostic performance  
545 and the epidemiological setting (e.g., clinical sensitivity reduces in low endemic setting [15,  
546 41], the sample throughput, and the operational costs (e.g., improving the diagnostic  
547 performance and the corresponding reduced sample sizes can compensate for more costly  
548 tests and lower sample throughput; there is a limit to the extent to which higher reagent costs  
549 can be compensated by lower sample throughput) [23, 42]. In other words, it would be quite  
550 impossible to draw conclusions on whether any new diagnostic method holds promise to  
551 inform large-scale deworming programs without fully exploring these aspects in more detail

552 [22, 41]. On top of these, we have set-up a usability experiment, to further adjust the AI-DP  
553 to user's requirements.

554

## 555 **2 Estimates of diagnostic performance are not absolute, but** 556 **relative to KK1.0**

557 For many infectious diseases, the absence of a gold standard (100% sensitivity and specificity)  
558 is a universal challenge to estimate the true performance of new diagnostics [48, 49]. To  
559 overcome this obstacle for STHs, it has been suggested to examine more stool samples with  
560 multiple diagnostic methods [50-53], and to deploy statistical methodologies that account for  
561 the absence of a gold standard [49]. In our study, we will determine the diagnostic  
562 performance of the AI-DP relative to the current diagnostic standard (KK1.0). In our opinion  
563 choosing KK1.0 as a sole comparator is justified. First, the AI-DP aims to improve the current  
564 KK1.0, and hence it is the obvious comparator to test the non-inferiority hypotheses. Second,  
565 for MHI infections, KK1.0 remains the sole diagnostic method to define the intensity of  
566 infections [23, 24]. Third, it has recently been shown that the clinical specificity, rather than  
567 the clinical sensitivity, will become more important when programs progress towards control  
568 and elimination of STH [23, 54]. Clinical specificity of KK1.0 thick smear (95% [16, 25, 26]) has  
569 never been considered as a drawback, which takes away the need for a more sensitive  
570 comparator (e.g., qPCR [15, 55]). Finally, we carefully designed the experiments so that we  
571 can ensure the true underlying infection status. For the KK smears representing no infections  
572 or infections of low intensity, we will have the ground truth based on the scans of the KK thick  
573 smears, while for the smears representing MHI infections we will spike the slides with known  
574 number of eggs. This design allows us to draw the appropriate conclusions around the defined



575 non-inferiority hypotheses without the need of other diagnostic methods (e.g., qPCR) or more  
576 complex statistical models that account for a gold standard.

577

### 578 **3 Alignment with WHO TPPs for STHs**

579 In 2021, WHO published its TPP for STH, defining the minimal and ideal criteria for 38  
580 attributes organized in five clusters (product use summary: 5 attributes; design: 11 attributes;  
581 performance: 10 attributes; product configuration: 5 attributes; product cost and channels: 5  
582 attributes)[24]. A year later, we systematically analysed this TPP for an AI-DP solution [27].  
583 **Fig 5** provides a graphical overview per cluster of how the current AI-DP already meets these  
584 criteria, and for which attributes this study will provide full, partial or no evidence. In S2 Info,  
585 we provide the same information for each attribute separately. Today, our AI-DP already  
586 meets 14 attributes and through this study we will provide partial or full evidence for another  
587 17 attributes. The study will not address the remaining 7 attributes because they are  
588 considered to be out of scope. Most of these attributes are within product configuration  
589 (shipping conditions and labelling and instructions for use), and product cost and channels  
590 (product lead times, target launch countries and product registration), and therefore will  
591 need to be addressed at a later stage when there is sufficient evidence that our AI-DP meets  
592 the other attributes. Note that, the reproducibility and repeatability is not considered as an  
593 attribute in the WHO TPP.

594

595 **Fig 5. Overview per cluster of how the current AI-DP already meets the attributes defined**  
596 **in the WHO TPP criteria, and for which attributes this study will provide full, partial or no**  
597 **evidence.**

598

## 599 **4 Moving from KK2.0 over KK2.1 to K2.2**

600 Today, the AI-DP still relies on the human operator to verify all the detections by AI (KK2.0).

601 It is our ambition to further minimize this in two consecutive steps. In first step, we will reduce

602 the number of detections presented for human verification, e.g., to the detections for which

603 there is doubt (KK2.1). In a final step, all human verification will be removed, and results will

604 rely on AI only (KK2.2). During this study, we will already gather the evidence for both KK2.1

605 and KK2.2 (secondary outcomes *S1.5*, *S2.2*, *S3.3*, *S4.3*; see Table 3). Moreover, through the

606 usability experiment we will be able to further customize the AI-DP and corresponding needs

607 of the key end-users.

608

## 609 **Conclusions**

610 This comprehensive study will provide the necessary data to make an evidence-based

611 decision on whether our AI-DP is indeed a cost-efficient end-to-end diagnostic to inform large-

612 scale deworming programs against STHs. In case of a favourable outcome, we will seek further

613 guidance by WHO. Meanwhile, we provide full access to sample size calculations and record

614 forms, which may be relevant for the evaluation of any other AI-DP or diagnostic.

## 615 **References**

- 616 1. Bethony J, Brooker S, Albonico M, Geiger SM, Loukas A, Diemert D, et al. Soil-  
617 transmitted helminth infections: ascariasis, trichuriasis, and hookworm. *The Lancet*.  
618 2006;367(9521):1521-32. doi: 10.1016/s0140-6736(06)68653-4.
- 619 2. Hotez PJ, Bundy DA, Beegle K, Brooker S, Drake L, de Silva N, et al. Helminth infections:  
620 soil-transmitted helminth infections and schistosomiasis. In: *Disease Control Priorities in*  
621 *Developing Countries*. 2nd edition. Washington (DC): The International Bank for  
622 Reconstruction and Development / The World Bank; 2006. Chapter 24.
- 623 3. World Health Organization. Preventive chemotherapy and Transmission Control  
624 Database; <https://www.who.int/data/preventive-chemotherapy>; accessed on July 1, 2023.
- 625 4. Global burden of 369 diseases and injuries in 204 countries and territories, 1990-2019:  
626 a systematic analysis for the Global Burden of Disease Study 2019. *Lancet*.  
627 2020;396(10258):1204-22. Epub 2020/10/19. doi: 10.1016/s0140-6736(20)30925-9. PubMed  
628 PMID: 33069326; PubMed Central PMCID: PMC7567026.
- 629 5. World Health Organization. Soil-transmitted helminth infections [Internet];  
630 <https://www.who.int/news-room/fact-sheets/detail/soil-transmitted-helminth-infections>;  
631 accessed on September 23 2023.
- 632 6. World Health Organization. *Helminth control in school-age children: a guide for*  
633 *managers of control programmes*. 2nd ed. 2011. ISBN: 9789241548267
- 634 7. World Health Organization. *2030 targets for soil-transmitted helminthiases control*  
635 *programmes*. Geneva. 2019. Licence: CC BY-NC-SA 3.0 IGO.
- 636 8. World Health Organization. *Schistosomiasis and soil-transmitted helminthiases:*  
637 *progress report, 2021*. *Weekly epidemiological record*. 2022;97(48):621-632.

- 638 9. Sartorius B, Cano J, Simpson H, Tusting LS, Marczak LB, Miller-Petrie MK, et al.  
639 Prevalence and intensity of soil-transmitted helminth infections of children in sub-Saharan  
640 Africa, 2000-18: a geospatial analysis. *Lancet Glob Health*. 2021;9(1):e52-e60. Epub  
641 2020/12/19. doi: 10.1016/s2214-109x(20)30398-3. PubMed PMID: 33338459; PubMed  
642 Central PMCID: PMCPMC7786448.
- 643 10. Bradley M, Taylor R, Jacobson J, Guex M, Hopkins A, Jensen J, et al. Medicine donation  
644 programmes supporting the global drive to end the burden of neglected tropical diseases.  
645 *Trans R Soc Trop Med Hyg*. 2021;115(2):136-44. Epub 2021/01/17. doi:  
646 10.1093/trstmh/traa167. PubMed PMID: 33452881; PubMed Central PMCID:  
647 PMCPMC7842096.
- 648 11. World Health Organization. Ending the neglect to attain the Sustainable Development  
649 Goals: a road map for neglected tropical diseases 2021–2030. Geneva; 2020. Licence: CC BY-  
650 NC-SA 3.0 IGO.
- 651 12. Katz N, Chaves A, Pellegrino J. A simple device for quantitative stool thick-smear  
652 technique in Schistosomiasis mansoni. *Rev Inst Med Trop Sao Paulo*. 1972;14(6):397-400.  
653 Epub 1972/11/01. PubMed PMID: 4675644.
- 654 13. World Health Organization. Bench aids for the diagnosis of intestinal parasites, second  
655 edition. Geneva. 2019. Licence: CC BY-NC-SA 3.0 IGO.
- 656 14. Dacombe RJ, Crampin AC, Floyd S, Randall A, Ndhlovu R, Bickle Q, et al. Time delays  
657 between patient and laboratory selectively affect accuracy of helminth diagnosis. *T Roy Soc  
658 Trop Med H*. 2007;101(2):140-5. doi: <https://doi.org/10.1016/j.trstmh.2006.04.008>.
- 659 15. Cools P, Vlaininck J, Albonico M, Ame S, Ayana M, José Antonio BP, et al. Diagnostic  
660 performance of a single and duplicate Kato-Katz, Mini-FLOTAC, FECPAKG2 and qPCR for the

- 661 detection and quantification of soil-transmitted helminths in three endemic countries. *Plos*  
662 *Neglect Trop D.* 2019;13(8):e0007446. doi: 10.1371/journal.pntd.0007446.
- 663 16. Nikolay B, Brooker SJ, Pullan RL. Sensitivity of diagnostic tests for human soil-  
664 transmitted helminth infections: a meta-analysis in the absence of a true gold standard. *Int J*  
665 *Parasitol.* 2014;44(11):765-74. Epub 2014/07/06. doi: 10.1016/j.ijpara.2014.05.009. PubMed  
666 PMID: 24992655; PubMed Central PMCID: PMC4186778.
- 667 17. Moser W, Barenbold O, Mirams GJ, Cools P, Vlaminck J, Ali SM, et al. Diagnostic  
668 comparison between FECPAKG2 and the Kato-Katz method for analyzing soil-transmitted  
669 helminth eggs in stool. *PLoS Negl Trop Dis.* 2018;12(6):e0006562. Epub 2018/06/05. doi:  
670 10.1371/journal.pntd.0006562. PubMed PMID: 29864132; PubMed Central PMCID:  
671 PMC6002127.
- 672 18. Cringoli G, Maurelli MP, Levecke B, Bosco A, Vercruysse J, Utzinger J, et al. The Mini-  
673 FLOTAC technique for the diagnosis of helminth and protozoan infections in humans and  
674 animals. *Nature Protocols.* 2017;12(9):1723-32. doi: 10.1038/nprot.2017.067.
- 675 19. Cringoli G, Rinaldi L, Maurelli MP, Utzinger J. FLOTAC: new multivalent techniques for  
676 qualitative and quantitative copromicroscopic diagnosis of parasites in animals and humans.  
677 *Nat Protoc.* 2010;5(3):503-15. Epub 2010/03/06. doi: 10.1038/nprot.2009.235. PubMed  
678 PMID: 20203667.
- 679 20. Ayana M, Vlaminck J, Cools P, Ame S, Albonico M, Dana D, et al. Modification and  
680 optimization of the FECPAKG2 protocol for the detection and quantification of soil-  
681 transmitted helminth eggs in human stool. *PLoS Negl Trop Dis.* 2018;12(10):e0006655. Epub  
682 2018/10/16. doi: 10.1371/journal.pntd.0006655. PubMed PMID: 30321180; PubMed Central  
683 PMCID: PMC6224113.

- 684 21. O'Connell EM, Nutman TB. Molecular Diagnostics for Soil-Transmitted Helminths. The  
685 American journal of tropical medicine and hygiene. 2016;95(3):508-13. Epub 2016/08/01. doi:  
686 10.4269/ajtmh.16-0266. PubMed PMID: 27481053.
- 687 22. Coffeng LE, Vlaminck J, Cools P, Denwood M, Albonico M, Ame SM, et al. A general  
688 framework to support cost-efficient fecal egg count methods and study design choices for  
689 large-scale STH deworming programs-monitoring of therapeutic drug efficacy as a case study.  
690 PLoS Negl Trop Dis. 2023;17(5):e0011071. Epub 2023/05/17. doi:  
691 10.1371/journal.pntd.0011071. PubMed PMID: 37196017; PubMed Central PMCID:  
692 PMCPMC10228800.
- 693 23. Levecke B, Coffeng LE, Hanna C, Pullan RL, Gass KM. Assessment of the required  
694 performance and the development of corresponding program decision rules for neglected  
695 tropical diseases diagnostic tests: Monitoring and evaluation of soil-transmitted helminthiasis  
696 control programs as a case study. PLoS Negl Trop Dis. 2021;15(9):e0009740. Epub  
697 2021/09/15. doi: 10.1371/journal.pntd.0009740. PubMed PMID: 34520474; PubMed Central  
698 PMCID: PMCPMC8480900.
- 699 24. World Health Organization. Diagnostic target product profiles for monitoring and  
700 evaluation of soil-trans- mitted helminth control programs. 2021. Licence: CC BY-NC-SA 3.0  
701 IGO.
- 702 25. Vlaminck J, Cools P, Albonico M, Ame S, Ayana M, Dana D, et al. An in-depth report of  
703 quality control on Kato-Katz and data entry in four clinical trials evaluating the efficacy of  
704 albendazole against soil-transmitted helminth infections. PLoS Negl Trop Dis.  
705 2020;14(9):e0008625. Epub 2020/09/22. doi: 10.1371/journal.pntd.0008625. PubMed PMID:  
706 32956390; PubMed Central PMCID: PMCPMC7549791.

- 707 26. Speich B, Ali SM, Ame SM, Albonico M, Utzinger J, Keiser J. Quality control in the  
708 diagnosis of *Trichuris trichiura* and *Ascaris lumbricoides* using the Kato-Katz technique:  
709 experience from three randomised controlled trials. *Parasit Vectors*. 2015;8:82. Epub  
710 2015/02/06. doi: 10.1186/s13071-015-0702-z. PubMed PMID: 25652120; PubMed Central  
711 PMCID: PMC4326492.
- 712 27. Ward P, Dahlberg P, Lagatie O, Larsson J, Tynong A, Vlaminc J, et al. Affordable  
713 artificial intelligence-based digital pathology for neglected tropical diseases: A proof-of-  
714 concept for the detection of soil-transmitted helminths and *Schistosoma mansoni* eggs in  
715 Kato-Katz stool thick smears. *Plos Neglect Trop D*. 2022;16(6):e0010500. doi:  
716 10.1371/journal.pntd.0010500.
- 717 28. Stuyver LJ, Levecke B. The role of diagnostic technologies to measure progress toward  
718 WHO 2030 targets for soil-transmitted helminth control programs. *PLoS Negl Trop Dis*.  
719 2021;15(6):e0009422. Epub 2021/06/04. doi: 10.1371/journal.pntd.0009422. PubMed PMID:  
720 34081694.
- 721 29. Vlaminc J, Cools P, Albonico M, Ame S, Ayana M, Bethony J, et al. Comprehensive  
722 evaluation of stool-based diagnostic methods and benzimidazole resistance markers to assess  
723 drug efficacy and detect the emergence of anthelmintic resistance: A Starworms study  
724 protocol. *PLoS Negl Trop Dis*. 2018;12(11):e0006912. Epub 2018/11/06. doi:  
725 10.1371/journal.pntd.0006912. PubMed PMID: 30388108; PubMed Central PMCID:  
726 PMC6235403.
- 727 30. Dana D, Roose S, Vlaminc J, Ayana M, Mekonnen Z, Geldhof P, et al. Longitudinal  
728 assessment of the exposure to *Ascaris lumbricoides* through copromicroscopy and serology  
729 in school children from Jimma Town, Ethiopia. *PLoS Negl Trop Dis*. 2022;16(1):e0010131.  
730 Epub 2022/01/19. doi: 10.1371/journal.pntd.0010131. PubMed PMID: 35041666.

- 731 31. Tadege B, Mekonnen Z, Dana D, Sharew B, Dereje E, Loha E, et al. Assessment of  
732 environmental contamination with soil-transmitted helminths life stages at school  
733 compounds, households and open markets in Jimma Town, Ethiopia. PLoS Negl Trop Dis.  
734 2022;16(4):e0010307. Epub 2022/04/05. doi: 10.1371/journal.pntd.0010307. PubMed PMID:  
735 35377880; PubMed Central PMCID: PMCPMC9009776.
- 736 32. Tadege B, Mekonnen Z, Dana D, Tiruneh A, Sharew B, Dereje E, et al. Assessment of  
737 the nail contamination with soil-transmitted helminths in schoolchildren in Jimma Town,  
738 Ethiopia. PLoS One. 2022;17(6):e0268792. Epub 2022/06/30. doi:  
739 10.1371/journal.pone.0268792. PubMed PMID: 35767573; PubMed Central PMCID:  
740 PMCPMC9242460.
- 741 33. Ayana M, Cools P, Mekonnen Z, Biruksew A, Dana D, Rashwan N, et al. Comparison of  
742 four DNA extraction and three preservation protocols for the molecular detection and  
743 quantification of soil-transmitted helminths in stool. PLoS Negl Trop Dis.  
744 2019;13(10):e0007778. Epub 2019/10/29. doi: 10.1371/journal.pntd.0007778. PubMed  
745 PMID: 31658264; PubMed Central PMCID: PMCPMC6837582.
- 746 34. Vlaminck J, Cools P, Albonico M, Ame S, Ayana M, Cringoli G, et al. Therapeutic efficacy  
747 of albendazole against soil-transmitted helminthiasis in children measured by five diagnostic  
748 methods. Plos Neglect Trop D. 2019;13(8):e0007471. doi: 10.1371/journal.pntd.0007471.
- 749 35. Dana D, Mekonnen Z, Emanu D, Ayana M, Getachew M, Workneh N, et al. Prevalence  
750 and intensity of soil-transmitted helminth infections among pre-school age children in 12  
751 kindergartens in Jimma Town, southwest Ethiopia. Trans R Soc Trop Med Hyg.  
752 2015;109(3):225-7. Epub 2014/11/06. doi: 10.1093/trstmh/tru178. PubMed PMID:  
753 25371496.



- 754 36. Mekonnen Z, Meka S, Ayana M, Bogers J, Vercruyssen J, Levecke B. Comparison of  
755 Individual and Pooled Stool Samples for the Assessment of Soil-Transmitted Helminth  
756 Infection Intensity and Drug Efficacy. *Plos Neglect Trop D.* 2013;7(5):e2189. doi:  
757 10.1371/journal.pntd.0002189.
- 758 37. Dana D, Vlaminck J, Ayana M, Tadege B, Mekonnen Z, Geldhof P, et al. Evaluation of  
759 copromicroscopy and serology to measure the exposure to *Ascaris* infections across age  
760 groups and to assess the impact of 3 years of biannual mass drug administration in Jimma  
761 Town, Ethiopia. *Plos Neglect Trop D.* 2020;14(4):e0008037. doi:  
762 10.1371/journal.pntd.0008037.
- 763 38. Lewis SJ, Heaton KW. Stool form scale as a useful guide to intestinal transit time. *Scand*  
764 *J Gastroenterol.* 1997;32(9):920-4. Epub 1997/09/23. doi: 10.3109/00365529709011203.  
765 PubMed PMID: 9299672.
- 766 39. Bosch F, Palmeirim MS, Ali SM, Ame SM, Hattendorf J, Keiser J. Diagnosis of soil-  
767 transmitted helminths using the Kato-Katz technique: What is the influence of stirring, storage  
768 time and storage temperature on stool sample egg counts? *PLoS Negl Trop Dis.*  
769 2021;15(1):e0009032. Epub 2021/01/23. doi: 10.1371/journal.pntd.0009032. PubMed PMID:  
770 33481808; PubMed Central PMCID: PMC7857572.
- 771 40. Vlaminck J, Cools P, Albonico M, Ame S, Ayana M, Cringoli G, et al. Therapeutic efficacy  
772 of albendazole against soil-transmitted helminthiasis in children measured by five diagnostic  
773 methods. *PLoS Negl Trop Dis.* 2019;13(8):e0007471. Epub 2019/08/02. doi:  
774 10.1371/journal.pntd.0007471. PubMed PMID: 31369562.
- 775 41. Kazienga A, Levecke B, Leta GT, de Vlas SJ, Coffeng LE. A general framework to support  
776 cost-efficient survey design choices for the control of soil-transmitted helminths when

- 777 deploying Kato-Katz thick smear. PLoS Negl Trop Dis. 2023;17(6):e0011160. Epub 2023/06/22.  
778 doi: 10.1371/journal.pntd.0011160. PubMed PMID: 37347783.
- 779 42. Kazienga A, Coffeng LE, de Vlas SJ, Levecke B. Two-stage lot quality assurance sampling  
780 framework for monitoring and evaluation of neglected tropical diseases, allowing for  
781 imperfect diagnostics and spatial heterogeneity. PLoS Negl Trop Dis. 2022;16(4):e0010353.  
782 Epub 2022/04/09. doi: 10.1371/journal.pntd.0010353. PubMed PMID: 35394996; PubMed  
783 Central PMCID: PMC9020685.
- 784 43. Lyon AR, Munson SA, Renn BN, Atkins DC, Pullmann MD, Friedman E, et al. Use of  
785 Human-Centered Design to Improve Implementation of Evidence-Based Psychotherapies in  
786 Low-Resource Communities: Protocol for Studies Applying a Framework to Assess Usability .  
787 JMIR Res Protoc. 2019;8(10):e14990. Epub 2019/10/11. doi: 10.2196/14990. PubMed PMID:  
788 31599736; PubMed Central PMCID: PMC6819011.
- 789 44. Boren T, Ramey J. Thinking aloud: reconciling theory and practice. IEEE Transactions  
790 on Professional Communication. 2000;43(3):261-78. doi: 10.1109/47.867942.
- 791 45. Montresor A, Crompton DWT, Hall A, Bundy DAP, Savioli L, World Health Organization.  
792 Division of Control of Tropical Diseases S, et al. Guidelines for the evaluation of soil-  
793 transmitted helminthiasis and schistosomiasis at community level : a guide for managers of  
794 control programmes. Geneva: World Health Organization; 1998.
- 795 46. Macefield R. How to specify the participant group size for usability studies: a  
796 practitioner's guide. Journal of Usability Studies archive. 2009;5:34-45.
- 797 47. Newcombe RG. Improved confidence intervals for the difference between binomial  
798 proportions based on paired data. Stat Med. 1998;17(22):2635-50. Epub 1998/12/05.  
799 PubMed PMID: 9839354.

- 800 48. Lewis FI, Torgerson PR. A tutorial in estimating the prevalence of disease in humans  
801 and animals in the absence of a gold standard diagnostic. *Emerging Themes in Epidemiology*.  
802 2012;9(1):9. doi: 10.1186/1742-7622-9-9.
- 803 49. Bärenbold O, Garba A, Colley DG, Fleming FM, Assaré RK, Tukahebwa EM, et al.  
804 Estimating true prevalence of *Schistosoma mansoni* from population summary measures  
805 based on the Kato-Katz diagnostic technique. *Plos Neglect Trop D*. 2021;15(4):e0009310. doi:  
806 10.1371/journal.pntd.0009310.
- 807 50. Knopp S, Mgeni AF, Khamis IS, Steinmann P, Stothard JR, Rollinson D, et al. Diagnosis  
808 of soil-transmitted helminths in the era of preventive chemotherapy: Effect of multiple stool  
809 sampling and use of different diagnostic techniques. *Plos Neglect Trop D*. 2008;2(11). doi:  
810 10.1371/journal.pntd.0000331.
- 811 51. Glinz D, Silué KD, Knopp S, Lohourignon LK, Yao KP, Steinmann P, et al. Comparing  
812 Diagnostic Accuracy of Kato-Katz, Koga Agar Plate, Ether-Concentration, and FLOTAC for  
813 *Schistosoma mansoni* and Soil-Transmitted Helminths. *Plos Neglect Trop D*. 2010;4(7):e754.  
814 doi: 10.1371/journal.pntd.0000754.
- 815 52. Jeandron A, Abdylidaeva G, Usubalieva J, Ensink JH, Cox J, Matthys B, et al. Accuracy  
816 of the Kato-Katz, adhesive tape and FLOTAC techniques for helminth diagnosis among  
817 children in Kyrgyzstan. *Acta Trop*. 2010;116(3):185-92. Epub 2010/08/31. doi:  
818 10.1016/j.actatropica.2010.08.010. PubMed PMID: 20800568.
- 819 53. Booth M, Vounatsou P, N'Goran E K, Tanner M, Utzinger J. The influence of sampling  
820 effort and the performance of the Kato-Katz technique in diagnosing *Schistosoma mansoni*  
821 and hookworm co-infections in rural Côte d'Ivoire. *Parasitology*. 2003;127(Pt 6):525-31. Epub  
822 2004/01/01. doi: 10.1017/s0031182003004128. PubMed PMID: 14700188.

- 823 54. Gass K. Time for a diagnostic sea-change: Rethinking neglected tropical disease  
824 diagnostics to achieve elimination. Plos Neglect Trop D. 2021;14(12):e0008933. doi:  
825 10.1371/journal.pntd.0008933.
- 826 55. Ásbjörnsdóttir KH, Ajjampur SSR, Anderson RM, Bailey R, Gardiner I, Halliday KE, et al.  
827 Assessing the feasibility of interrupting the transmission of soil-transmitted helminths  
828 through mass drug administration: The DeWorm3 cluster randomized trial protocol. PLoS  
829 Negl Trop Dis. 2018;12(1):e0006166. Epub 2018/01/19. doi: 10.1371/journal.pntd.0006166.  
830 PubMed PMID: 29346377; PubMed Central PMCID: PMC5773085.

## 831 **Supplementary info**

832 **S1 Info. The methodology to determine the required sample sizes to test the project**

833 **hypotheses around diagnostic performance, repeatability, and reproducibility.**

834 **S2. Info. Detailed overview of how our current AI-DP already meets the attributes defined**

835 **in the WHO TPP criteria, and for which attributes this study will provide full, partial or no**

836 **evidence.**

837

## 838 **Funding**

839 This study will be financially supported by a Johnson & Johnson Foundation project (Funder:

840 Johnson & Johnson Foundation Scotland, Grantee: Enablers AB, ID: 76906491). The funding

841 body did not have any role in the writing of this manuscript.

842

## 843 **Acknowledgements**

844 We are extremely grateful to Dr. Lieven Stuyver (Janssen Global Public Health, Janssen R&D,

845 2340 Beerse, Belgium) for initiating the concept of an AI-DP for NTDS, and to continue steering

846 multi-disciplinary teams worldwide towards a proof-principle for the AI-DP described in this

847 work.

**Step 1**  
participant registration

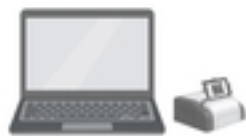

electronic data capture  
QR-code printing

**Step 2**  
sample processing

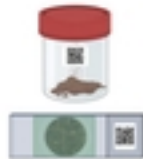

sample collection  
KK thick smear preparation

**Step 3**  
scanning process

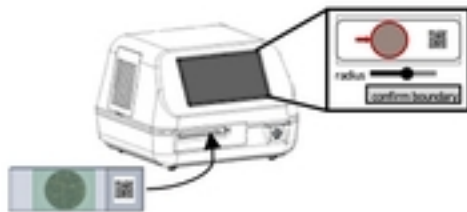

slide loading  
boundary confirmation  
automated slide scanning

**Step 4**  
AI process

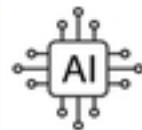

egg identification  
and quantification

**Step 5**  
verification process

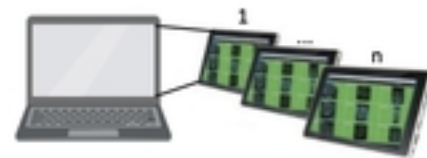

AI-determinants confirmation

Figure 1

**Step 1**  
collect sample

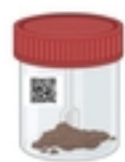

randomization  
process

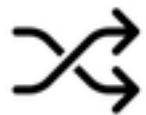

**Step 2**

**2A (FOV-based validation)**  
give Bristol score  
prepare one barcoded KK thick smear

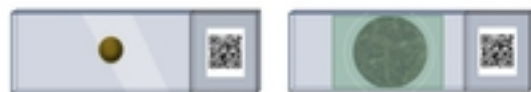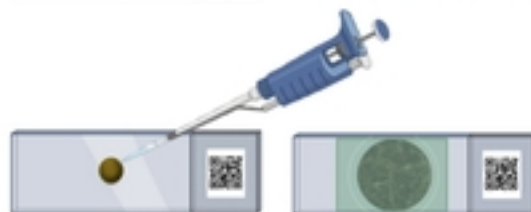

**2B (egg spiking-based validation)**  
give Bristol score  
prepare one barcoded KK thick smear  
spike the cone of stool with purified eggs

**Step 3**  
incubate 30 minutes

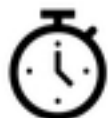

odd ID

even ID

**Step 4**  
record egg counts by KK1.0 and KK2.0

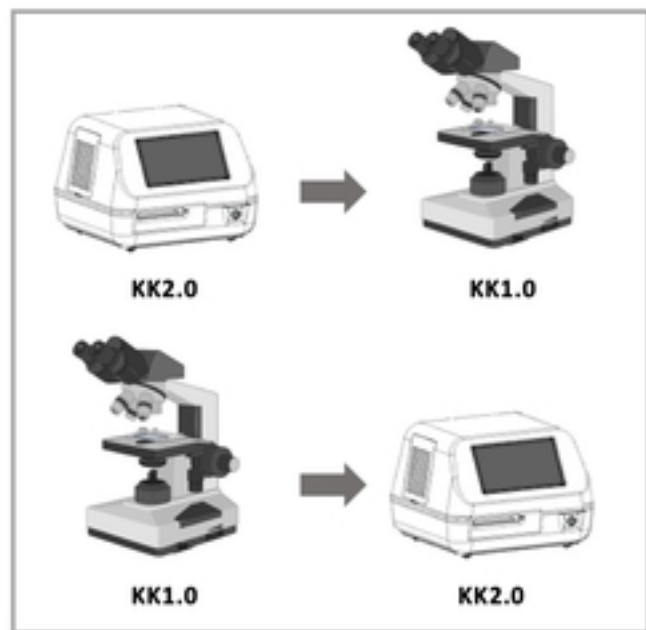

**Step 5**  
store slide

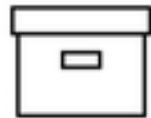

Figure 2

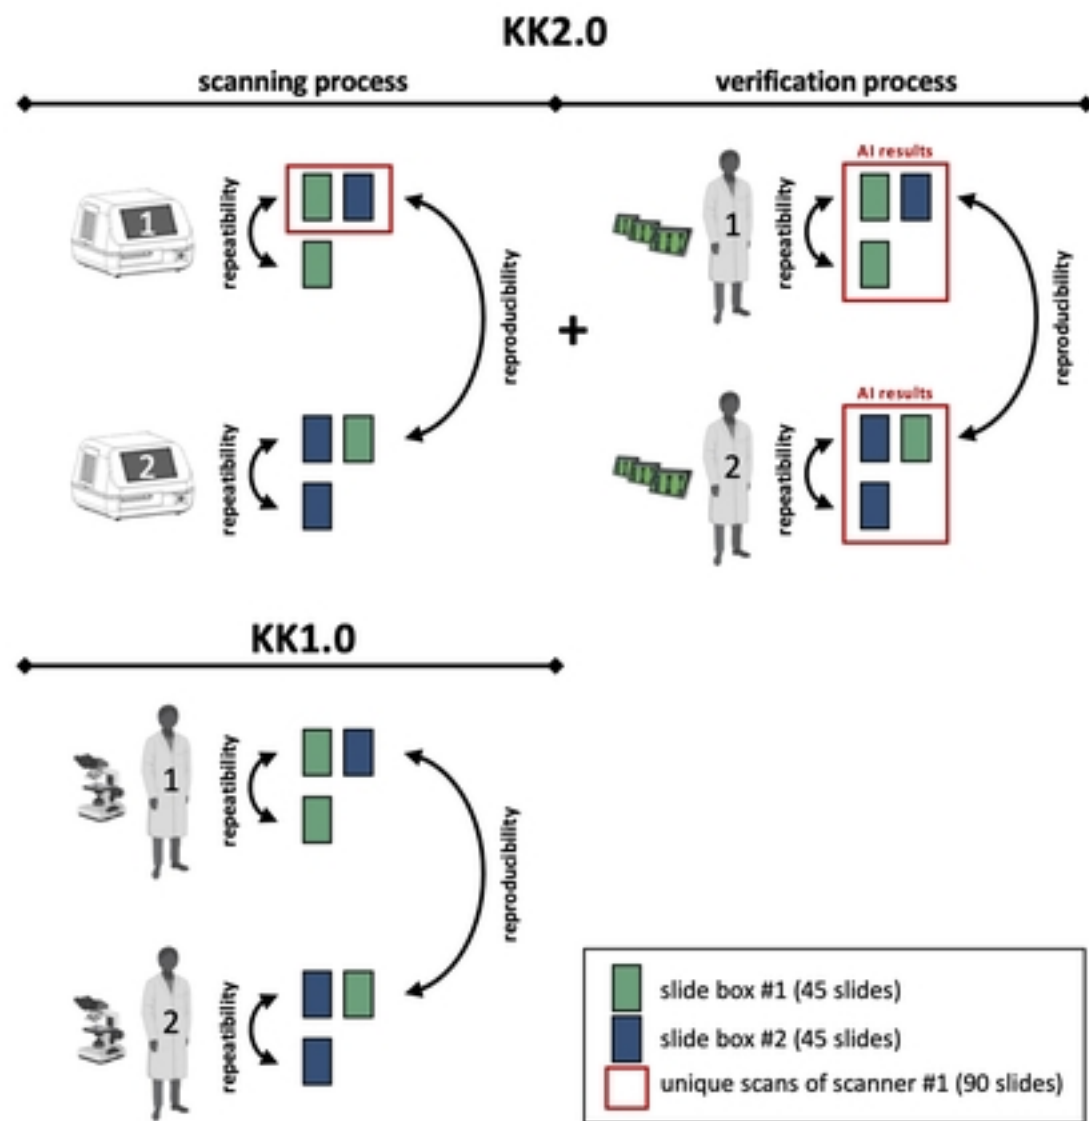

Figure 3



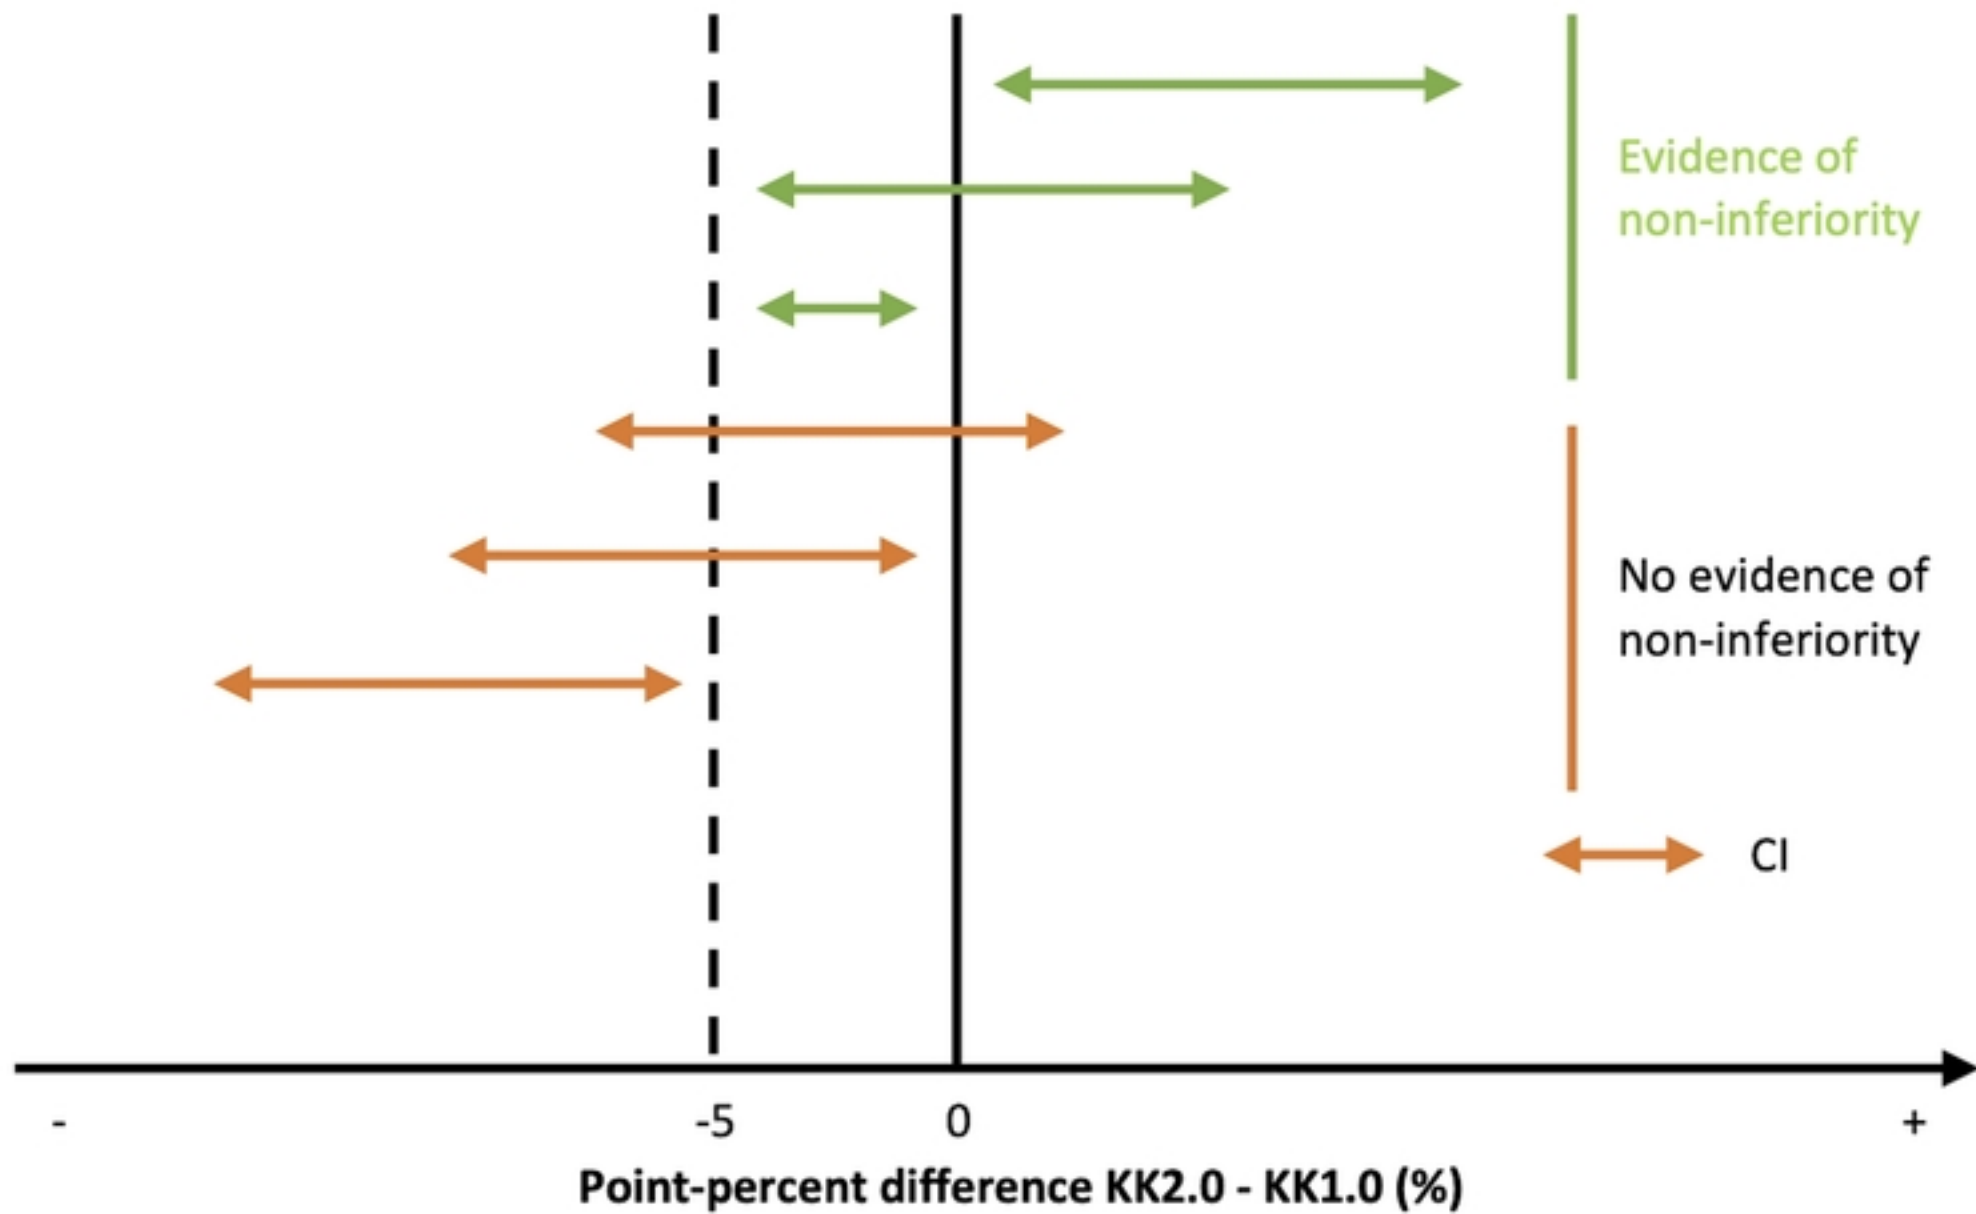

Figure 4

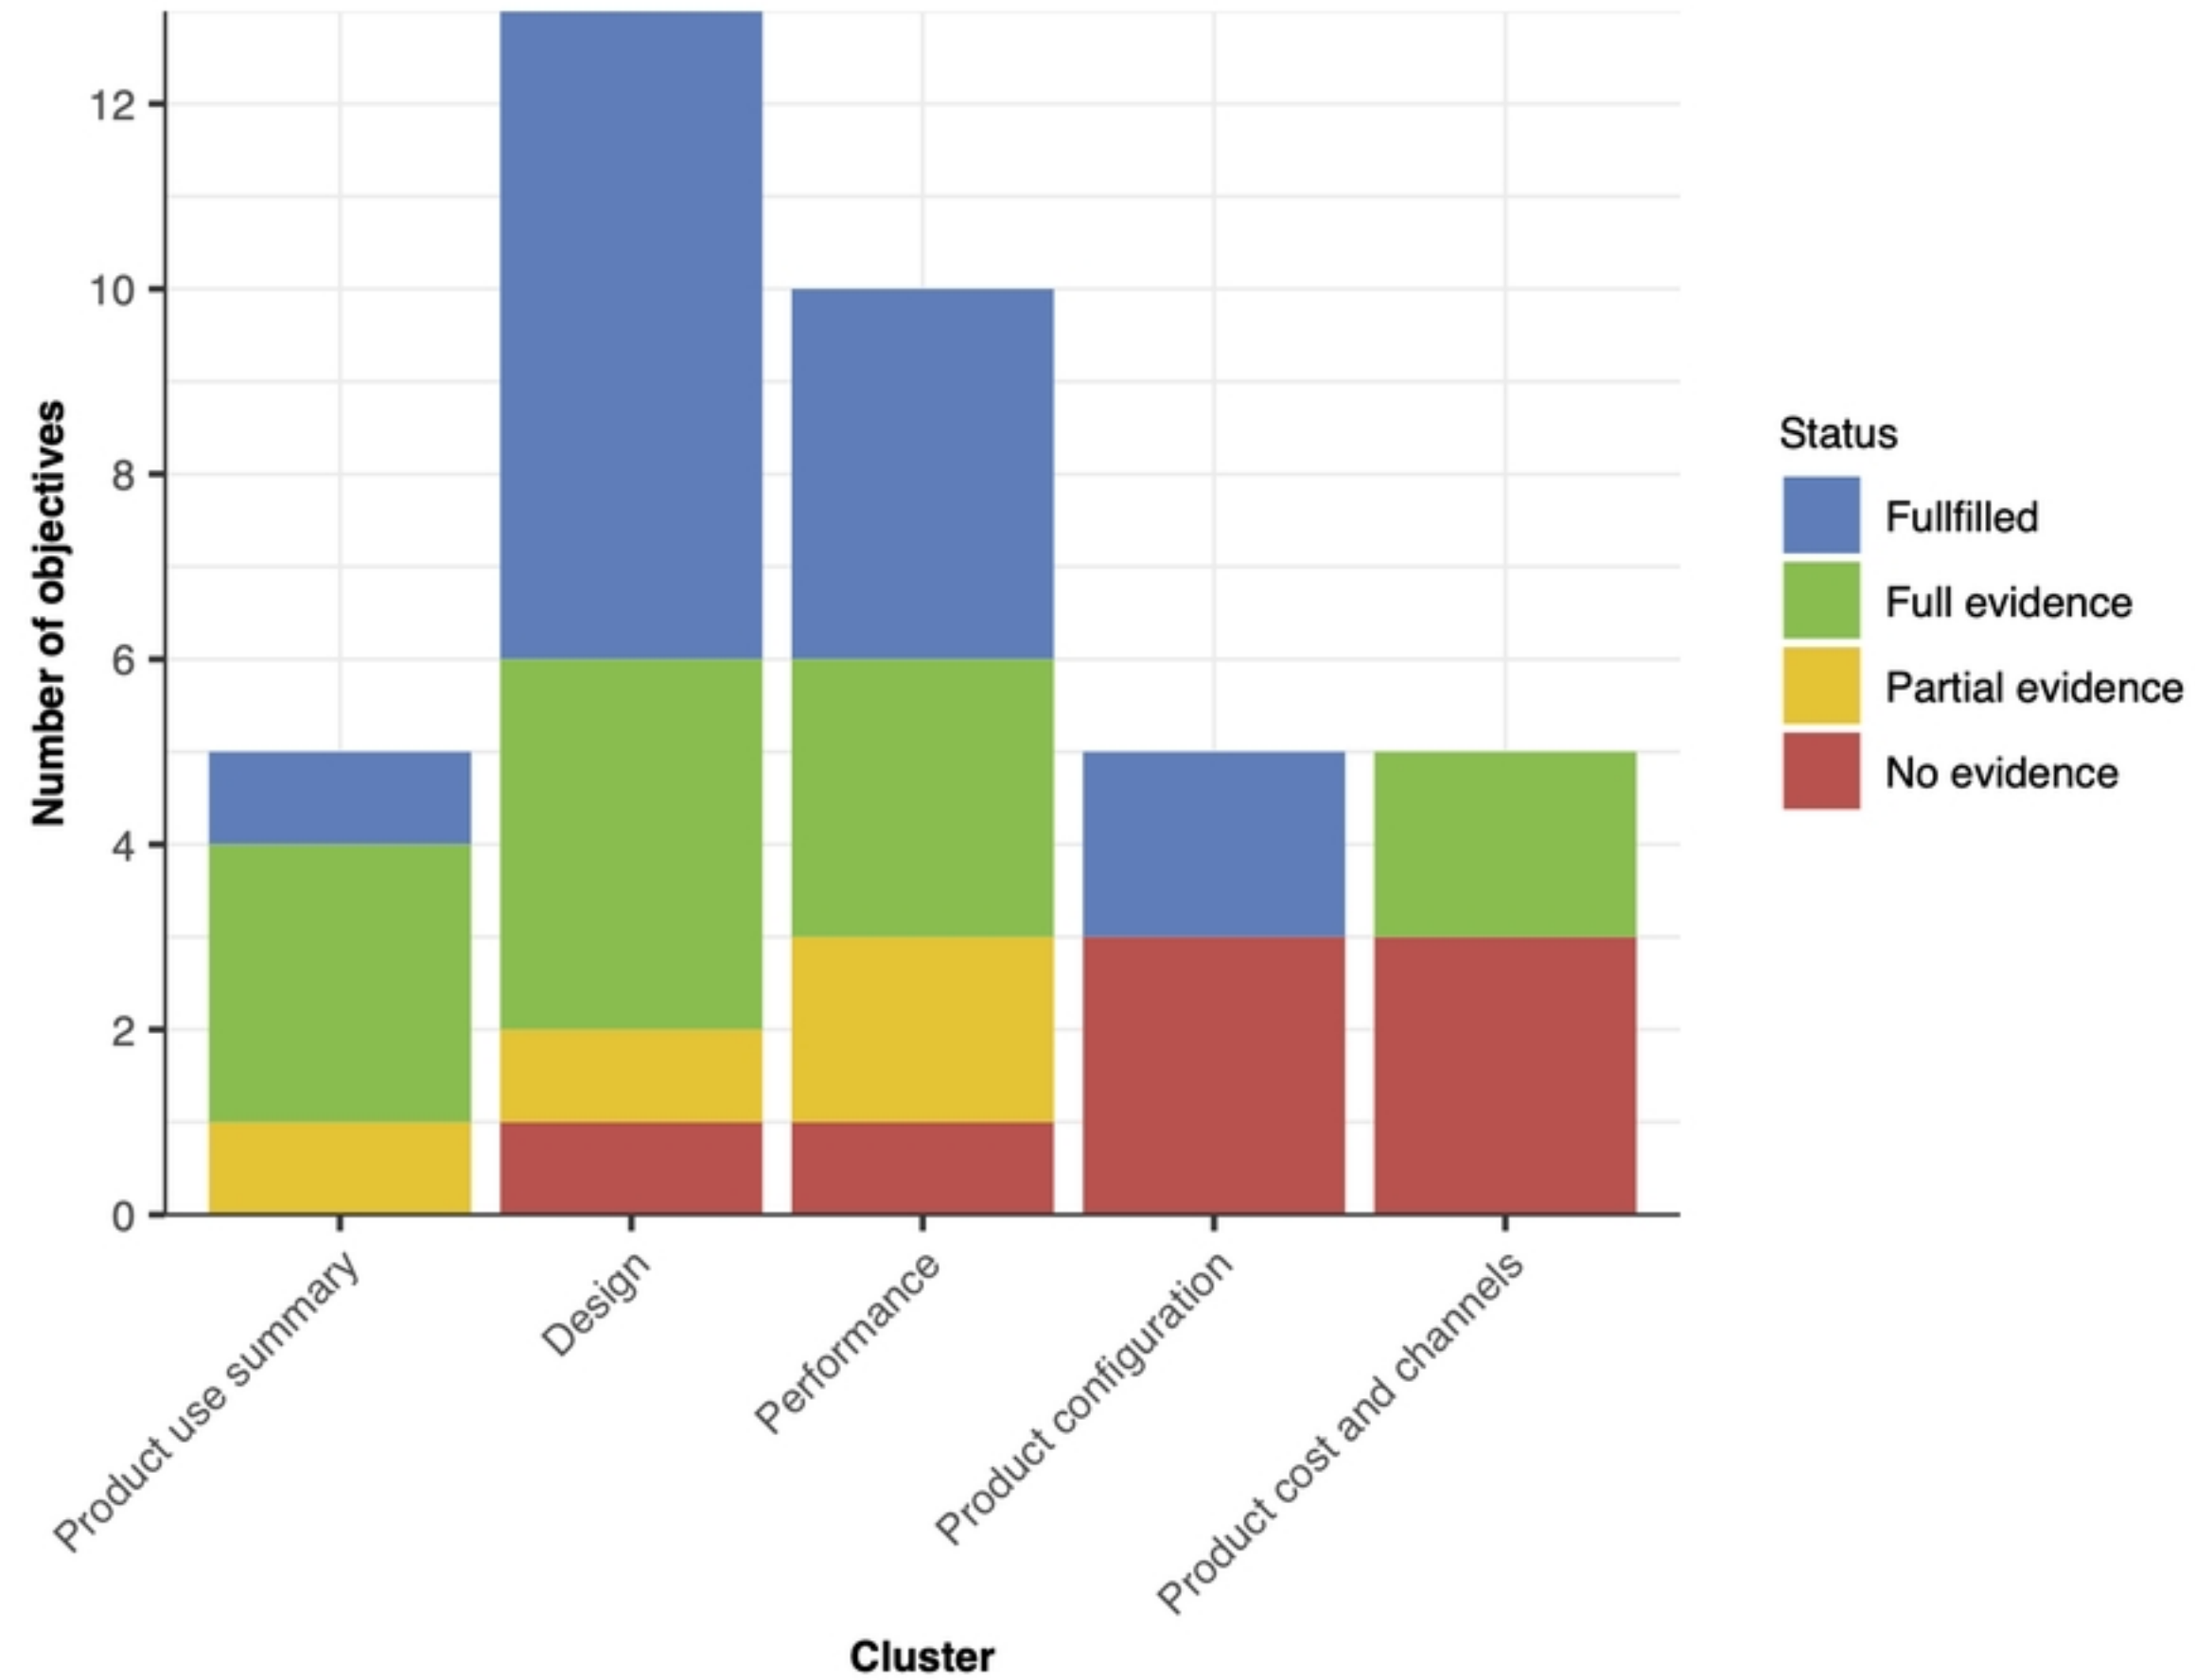

Figure 5
